# Supplementary material for: Benzyne addition to a metal–carbon multiple bond
Source: Royal Society of Chemistry journal article supplement (doi:10.1039/d1dt01402a), 2021-01-01
Supplement: d1dt01402a1.pdf [file d1dt01402a1.pdf]

## Benzyne addition to a metal-carbon multiple bond

Harrison J. Barnett and Anthony F. Hill\*

Received 19th April 2021,  
Accepted 00th January 20xx

DOI: 10.1039/x0xx00000x

www.rsc.org/

### Experimental Procedures

Unless otherwise stated, experimental work was carried out at room temperature under a dry and oxygen-free nitrogen atmosphere using standard Schlenk techniques with dried and degassed solvents.

NMR spectra were obtained on a Bruker 400 ( $^1\text{H}$  at 400.1 MHz,  $^{13}\text{C}$  at 100.6 MHz,  $^{31}\text{P}$  at 162.0 MHz), a Bruker Avance 600 ( $^1\text{H}$  at 600.0 MHz,  $^{13}\text{C}$  at 150.9 MHz) or a Bruker Avance 700 ( $^1\text{H}$  at 700.0 MHz,  $^{13}\text{C}$  at 176.1 MHz) spectrometers at the temperatures indicated. Chemical shifts ( $\delta$ ) are reported in ppm with coupling constants given in Hz and are referenced to the solvent peak, or external references ( $\text{H}_3\text{PO}_4$  in  $\text{H}_2\text{O}$  for  $^{31}\text{P}$ ). Multiplicities given in parentheses ( $^{31}\text{P}$ ) are from NMR simulations performed in gNMR. The multiplicities of NMR resonances are denoted by the abbreviations s (singlet), d (doublet), t (triplet), m (multiplet), br (broad) and combinations thereof for more highly coupled systems. In some cases, distinct peaks were observed in the  $^1\text{H}$  and  $^{13}\text{C}\{^1\text{H}\}$  NMR spectra, but to the level of accuracy that is reportable (i.e. 2 decimal places for  $^1\text{H}$  NMR, 1 decimal place for  $^{13}\text{C}$  NMR) they are reported as having the same chemical shift. The abbreviation 'dppm  $\text{C}_6\text{H}_5$ ' is used to refer to the phenyl rings on the (diphenylphosphino)methane ligand. Spectra provided generally correspond to samples obtained directly from chromatography and may contain residual solvent as recrystallised samples often display reduced solubility.

Infrared spectra were obtained using a PerkinElmer FTIR spectrometer. The strengths of IR absorptions are denoted by the abbreviations vs (very strong), s (strong), m (medium), w (weak), sh (shoulder) and br (broad). Elemental microanalytical data were provided by Macquarie University. High-resolution electrospray ionisation mass spectrometry (ESI-MS) was performed by the ANU Research School of Chemistry mass spectrometry service with acetonitrile as the matrix.

Data for X-ray crystallography were collected with an Agilent SuperNova CCD diffractometer using Cu-K $\alpha$  radiation ( $\lambda = 1.54184 \text{ \AA}$ ) at 150 K using the CrysAlis PRO software.<sup>1</sup> The structures were solved iteratively (intrinsic phasing) using the SHELXT program and refined by full-matrix least-squares on  $F^2$  using the SHELXL program.<sup>2</sup> Hydrogen atoms were located geometrically and refined using a riding model. Diagrams were produced using the CCDC visualisation program Mercury.<sup>3</sup>

The synthesis of **1** has been described previously.<sup>4</sup> All other chemicals were purchased and used as described. 'TBAF' refers to a commercially available (Sigma-Aldrich product 216143) 1.0 M solution in THF purported to contain 5% wt% (ca 3 M) water.

**Synthesis of  $[\text{Rh}_2(\mu_2\text{-C})(\mu\text{-Cl})(\kappa_2\text{-C}_6\text{H}_4)(\text{C}_6\text{H}_5)\text{Cl}_2(\mu\text{-dppm})_2]$  (**2**).** To a flask containing **1** (0.050 g, 0.047 mmol)

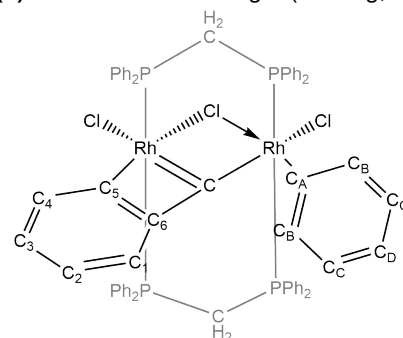

and 2-(trimethylsilyl)phenyl trifluoromethanesulfonate (0.023 mL, 1.229  $\text{g cm}^{-3}$ , 0.095 mmol) was added acetonitrile (20 mL). To this red solution, TBAF (1.0 M solution in THF, 0.10 mL, 0.10 mmol) was added, and the resulting dark red solution was stirred for two hours. After this time the volatiles were removed *in vacuo* and the residue was subjected to column chromatography (10 x 1 cm silica gel column), eluting initially with neat  $\text{CH}_2\text{Cl}_2$  and then with 1:19 THF: $\text{CH}_2\text{Cl}_2$ . An orange/pink band was collected, and the volatiles were removed under reduced pressure to give a pink microcrystalline solid of pure **2** (0.019 g, 0.015 mmol, 32%). IR (ATR,  $\text{cm}^{-1}$ ): 3050w, 2935w, 1434s.  $^1\text{H}$  NMR (400 MHz,  $\text{CDCl}_3$ , 298 K):  $\delta_{\text{H}} = 2.78$  (s, 4H,  $\text{PCH}_2\text{P}$ ), 5.36 (d,  $J = 7.3$  Hz, 1H,  $\text{H}_1$ ), 6.00 (dd,  $J = 7.4$  Hz, 2H,  $\text{H}_C$ ), 6.22 (t,  $J = 7.1$  Hz, 1H,  $\text{H}_D$ ), 6.60 (dd,  $J = 7.6$  Hz, 1H,  $\text{H}_3$ ), 6.74 (dd,  $J = 7.4$  Hz, 1H,  $\text{H}_2$ ), 6.77 (d,  $J = 7.7$  Hz, 2H,  $\text{H}_B$ ), 6.95 (t,  $J = 7.7$  Hz, 4H, dppm  $\text{C}_6\text{H}_5$ ), 7.00-7.02 (m, 9H, dppm  $\text{C}_6\text{H}_5$ ), 7.06-7.13 (m, 12H, dppm  $\text{C}_6\text{H}_5$ ),

\* Research School of Chemistry, Australian National University, Canberra, Australian Capital Territory, ACT 2601, Australia.

† Corresponding author: Email: a.hill@anu.edu.au

Electronic Supplementary Information (ESI) available: Synthetic procedures, spectroscopic and crystallographic data. See DOI: 10.1039/x0xx00000x. CCDC 2035999 and 2069151 contain the supplementary crystallographic data for this paper. These data can be obtained free of charge from The Cambridge Crystallographic Data Centre.

7.20-7.23 (m, 6H, dppm  $C_6H_5$ ), 7.37-7.40 (m, 4H, dppm  $C_6H_5$ ), 7.60 (d,  $J = 7.8$  Hz, 1H,  $H_4$ ), 7.88-7.91 (m, 4H, dppm  $C_6H_5$ ), 8.23-8.25 (m, 4H, dppm  $C_6H_5$ ).

$^{13}C\{^1H\}$  NMR (151 MHz,  $CDCl_3$ , 298 K):  $\delta_C = 394.8$  (m,  $\mu_2$ -C), 171.3 (m,  $C_5$ ), 144.9 (dt,  $^1J_{RHC} = 35$  Hz,  $^2J_{RHP} = 7$  Hz,  $C_A$ ), 141.6 (s,  $C_B$ ), 138.7-139.0 (m,  $C_6$ ), 138.1 (s,  $C_2$ ), 136.5, 136.2 (2 x m, dppm  $C_6H_5$ ), 135.8 (s,  $C_1$ ), 133.9, 133.4 (2x m, dppm  $C_6H_5$  ipso), 131.8 (s, dppm  $C_6H_5$ ), 130.8 (m, dppm  $C_6H_5$ ), 130.5 (s, dppm  $C_6H_5$ ), 129.8 (s, dppm  $C_6H_5$ ), 129.5 (s, dppm  $C_6H_5$ ), 128.0 (m, dppm  $C_6H_5$ ), 127.8 (m, dppm  $C_6H_5$ ), 127.5 (m, dppm  $C_6H_5$ ), 127.1 (t,  $J = 25$  Hz, dppm  $C_6H_5$ ), 124.5 (s,  $C_C$ ), 124.2 (s,  $C_3$ ), 121.7 (s,  $C_D$ ), 120.7 (s,  $C_4$ ), 22.9-23.0 (m,  $-CH_2-$ ).  $^{31}P\{^1H\}$  NMR (162 MHz,  $CDCl_3$ , 298 K):  $\delta_P = 1.93$  (ddd,  $^1J_{RHP} = 119$  Hz,  $^3J_{RHP} = (21)$  Hz,  $^4J_{PP} = (11)$  Hz), 6.92 (ddd,  $^1J_{RHP} = 125$  Hz,  $^3J_{RHP} = (21)$  Hz,  $^4J_{PP} = (11)$  Hz). MS (ESI,  $m/z$ ): Found: 1209.0574. Calcd for  $C_{57}H_{50}^{35}Cl_2P_4^{103}Rh_2$   $[M-Cl]^+$ : 1209.0585. Anal. Found: C, 59.89; H, 4.74%. Calcd for  $C_{63}H_{53}Cl_3P_4Rh_2$ : C, 59.95; H, 4.37%. Crystals suitable for structure determination were grown by slow evaporation of a  $CH_2Cl_2$ /toluene mixture. Crystal data for  $C_{63}H_{53}Cl_3P_4Rh_2 \cdot C_7H_8$ : ( $M_w = 1328.16$  g.mol $^{-1}$ ): tetragonal, space group  $P4_12_12$ ,  $a = 15.01727(5)$ ,  $c = 26.39108(12)$  Å,  $V = 5951.67(5)$  Å $^3$ ,  $Z = 4$ ,  $T = 150.0(1)$  K, pink block 0.11 x 0.095 x 0.045,  $\mu(CuK\alpha) = 7.03$  mm $^{-1}$ ,  $D_{calc} = 1.391$  Mg.m $^{-3}$ , 108169 reflections measured ( $8.2^\circ \leq 2\theta \leq 147.2^\circ$ ), 6006 unique ( $R_{int} = 0.034$ ) which were used in all calculations. The final  $R_1$  was 0.030 ( $I > 2\sigma(I)$ ) and  $wR_2$  was 0.082 (all data) for 472 refined parameters with 334 restraints. CCDC 2035999. An orthorhombic space group refinement of this dataset was used to confirm the approximately 50:50 disorder of the benzyne/phenyl ligands.

The synthesis of the isotopologue  $[Rh_2(\mu_2-^{13}C)(\mu-Cl)(\kappa_2-C_6H_4)(C_6H_5)Cl_2(\mu-dppm)_2]$  (**2'**) was achieved through identical reaction conditions when using  $[Rh_2(\mu_2-^{13}C)Cl_2(\mu-dppm)_2]$  as the starting material.

**Synthesis of  $[Rh_2(\mu-CC_6H_4)(\mu-Cl)RCl_2(\mu-dppm)_2]$  ( $R = Cl$ ,  $C_6H_5$  1:1 admixture).** To a flask containing  $[Rh_2(\mu_2-C)Cl_2(\mu-dppm)_2]$  (0.033 g, 0.031 mmol), ammonium chloride (0.055 g, 1.03 mmol, 33 eq.), and 2-(trimethylsilyl)phenyl trifluoromethanesulfonate (0.050 mL, 0.206 mmol) was added acetonitrile (25 mL). To this yellow solution was added TBAT (0.039 g, 0.072 mmol). The solution remains yellow in colour and is stirred for 15 hours at room temperature. After this time, the volatiles were removed *in vacuo* and the residue was subjected to column chromatography (10 x 1 cm silica gel column), eluting initially with neat  $CH_2Cl_2$  and then with 1:19 THF: $CH_2Cl_2$ . A yellow band was collected, and the volatiles were removed under reduced pressure to give a beige inseparable mixture of **2** and **4** in equal amounts (combined yield 0.012 g). IR (ATR,  $cm^{-1}$ ): 3052, 3050, 2937, 1434.  $^1H$  NMR (400 MHz,  $CDCl_3$ , 298 K):  $\delta_H = 2.74$ , 3.01 (2 x m, 4H,  $-PCH_2P$ ), 5.23 (d,  $J = 7.4$  Hz, 1H,  $H_1$ ), 6.73 (dd,  $J = 7.3$  Hz, 1H,  $H_3$ ), 6.84 (dd,  $J = 7.4$  Hz, 1H,  $H_2$ ), 6.95 (t,  $J = 7.7$  Hz, 4H, dppm  $C_6H_5$ ), 7.42-7.53 (m, 12H, dppm  $C_6H_5$ ), 7.62-7.65 (m, 3H, dppm

$C_6H_5$ ), 7.68-7.73 (m, 4H, dppm  $C_6H_5$ ), 8.03 (d,  $J = 7.8$  Hz, 1H,  $H_4$ ), 8.06-8.11 (m, 4H, dppm  $C_6H_5$ ). Remaining aromatic environments were unable to be clearly distinguished from those of **2**. The  $^{13}C$  NMR data was unable to be distinguished from that of **2**.  $^{31}P\{^1H\}$  NMR (162 MHz,  $CDCl_3$ , 298 K):  $\delta_P = 0.74$  (dt,  $^1J_{RHP} = 96$  Hz,  $^3J_{RHP} = 14$  Hz), 7.14 (m). MS (ESI,  $m/z$ ): Found: 1167.0416. Calcd for  $C_{57}H_{48}^{35}Cl_3P_4^{103}Rh_2$   $[M-Cl]^+$ : 1166.9882. Anal. Found: C, 59.90; H, 4.75%. Calcd for  $0.5(C_{63}H_{53}Cl_3P_4Rh_2) + 0.5(C_{57}H_{48}Cl_4P_4Rh_2)$ : C, 60.57; H, 4.28%. A crystal suitable for structure determination was grown by slow evaporation of a  $CH_2Cl_2$ /toluene mixture. Crystal data for  $C_{60}H_{50.5}Cl_{3.5}P_4Rh_2$  (0.5 **2** + 0.5 **4**) ( $M = 1225.28$  g.mol $^{-1}$ ): tetragonal, space group  $P4_12_12$ ,  $a = 14.9951(1)$ ,  $c = 26.1521(4)$  Å,  $V = 5880.38(12)$  Å $^3$ ,  $Z = 4$ ,  $T = 150.0(1)$  K,  $\mu(CuK\alpha) = 7.31$  mm $^{-1}$ ,  $D_{calc} = 1.384$  g.cm $^{-3}$ , 10253 reflections measured ( $4.2^\circ \leq 2\theta \leq 141.6^\circ$ ), 5538 unique ( $R_{int} = 0.028$ ) which were used in all calculations. The final  $R_1$  was 0.034 ( $I > 2\sigma(I)$ ) and  $wR_2$  was 0.100 (all data) for 365 refined parameters with 97 restraints. CCDC 2069151.

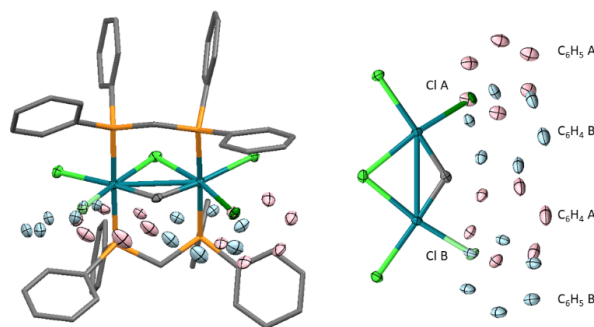

**Figure S1.** Superimposed molecular structures of  $[Rh_2(\mu-CC_6H_4)(\mu-Cl)RCl_2(\mu-dppm)_2]$  ( $R = Cl$  **4**,  $C_6H_5$  **2**) in a crystal of **40.5.20.5**. Inset: symmetry-driven dual-occupancy of benzyne and phenyl ligands (in pink and blue) and further 1:1 occupation of chloride ligand (light and dark green).

## Author Contributions

Both HJB and AFH contributed equally to the conceptualization, experimental design, interpretation of experimental results and manuscript compilation. All experimental procedures and data acquisition, including structural analysis, were executed by HJB. AFH was responsible for overall project administration and direction.

## Computational Details

Computational studies were performed by using the SPARTAN18<sup>®</sup> suite of programs.<sup>4</sup> Geometry optimisation (gas phase) was performed at the DFT level of theory using the exchange functional ( $\omega$ BP97X-D) of Head-Gordon.<sup>5</sup> The Los Alamos effective core potential type basis set (LANL2DZ) of Hay

and Wadt<sup>6</sup> was used for Rh; the Pople 6-31G\* basis sets<sup>7</sup> were used for all other atoms. Frequency calculations were performed to confirm that the optimized structures were minima and also to identify vibrational modes of interest.

### [Rh<sub>2</sub>(μ-CC<sub>6</sub>H<sub>4</sub>)HCl<sub>2</sub>(μ-dHpm)<sub>2</sub>]

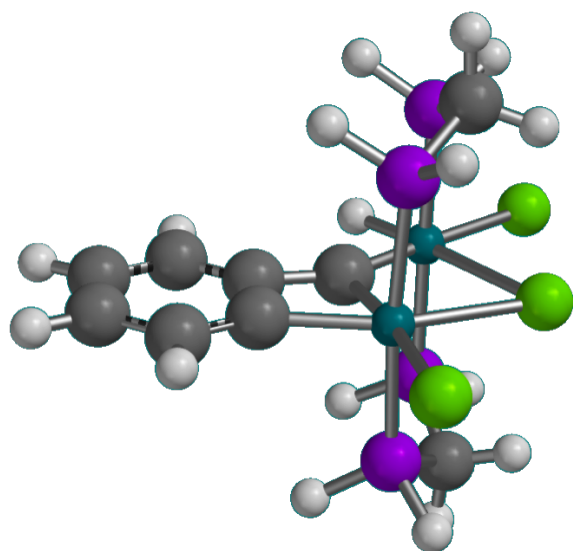

Figure S2. Optimised geometry for [Rh<sub>2</sub>(μ-CC<sub>6</sub>H<sub>4</sub>)HCl<sub>2</sub>(μ-dHpm)<sub>2</sub>] (DFT:ωBP97X-D/LANL2Dζ, gas phase).

#### Cartesian Coordinates

| Atom | x            | y            | z            |
|------|--------------|--------------|--------------|
| Rh1  | -0.711963251 | 0.126857496  | -1.307713837 |
| Cl2  | 1.527358830  | -0.257983134 | -2.561218844 |
| Rh3  | 2.153453700  | -0.381621426 | 0.135408908  |
| C4   | 0.279552300  | -0.049903988 | 0.353357211  |
| C5   | -0.812579126 | 0.140570405  | 1.266953177  |
| C6   | -3.347271782 | 0.584004419  | 2.174158857  |
| C7   | -1.863967872 | 0.326074431  | 0.340547732  |
| C8   | -1.003242273 | 0.172736525  | 2.654231191  |
| C9   | -2.299692003 | 0.399636331  | 3.094442708  |
| C10  | -3.155626561 | 0.551875499  | 0.788861888  |
| H11  | -0.176989281 | 0.027862482  | 3.344944763  |
| H12  | -2.516890044 | 0.436775005  | 4.157175138  |
| H13  | -3.983326195 | 0.697824180  | 0.102238582  |
| H14  | -4.348040226 | 0.758292942  | 2.561882362  |
| Cl15 | -2.254314271 | 0.403545975  | -3.241153890 |
| Cl16 | 4.527007885  | -0.798882154 | -0.253898929 |
| P17  | -1.013611237 | -2.190933871 | -1.357971236 |
| P18  | 1.717794347  | -2.667102826 | 0.080892468  |
| P19  | -0.205785451 | 2.409329728  | -1.349319159 |
| P20  | 2.522427255  | 1.917747534  | 0.096022588  |
| Atom | x            | y            | z            |
| C21  | 1.602004578  | 2.813992443  | -1.238717752 |
| H22  | 1.754221606  | 3.893374779  | -1.152518350 |
| H23  | 2.038999755  | 2.465209257  | -2.179911575 |
| C24  | 0.550148585  | -3.183570413 | -1.259743796 |
| H25  | 1.079201459  | -2.984702554 | -2.197660864 |
| H26  | 0.330490158  | -4.252568372 | -1.191163669 |
| H27  | 2.356564007  | -0.424212121 | 1.654625127  |
| H28  | 2.819114303  | -3.505252634 | -0.141479065 |
| H29  | 1.154183182  | -3.276254881 | 1.217742019  |
| H30  | -1.801448477 | -2.783529511 | -0.351490303 |
| H31  | -1.618086015 | -2.718025471 | -2.507646782 |
| H32  | -0.588132339 | 3.109499971  | -2.501871254 |

|     |              |             |              |
|-----|--------------|-------------|--------------|
| H33 | -0.753206047 | 3.232858099 | -0.345818507 |
| H34 | 3.843357313  | 2.333473721 | -0.122533604 |
| H35 | 2.198293189  | 2.673002135 | 1.238346697  |

Thermodynamic properties (298.15 K): ZPE = 587.50 kJmol<sup>-1</sup>, H<sup>o</sup> = -3317.833482 au, S<sup>o</sup> = 720.02 Jmol<sup>-1</sup>K<sup>-1</sup>, G<sup>o</sup> = -3317.915247, C<sub>v</sub> = 383.59 Jmol<sup>-1</sup>K<sup>-1</sup>.

### [Rh<sub>2</sub>(μ-CC<sub>6</sub>H<sub>4</sub>)(C<sub>6</sub>H<sub>5</sub>)Cl<sub>2</sub>(μ-dmpm)<sub>2</sub>]

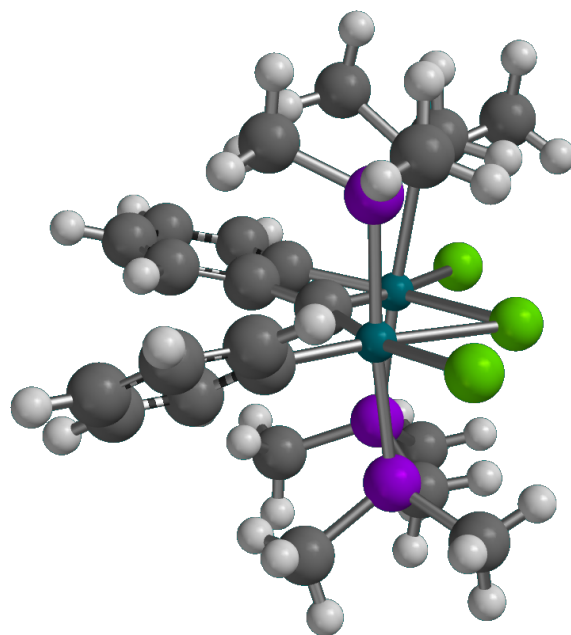

Figure S3. Optimised geometry for [Rh<sub>2</sub>(μ-CC<sub>6</sub>H<sub>4</sub>)(C<sub>6</sub>H<sub>5</sub>)Cl<sub>2</sub>(μ-dmpm)<sub>2</sub>] (DFT:ωBP97X-D/LANL2Dζ, gas phase).

#### Cartesian Coordinates

| Atom | x            | y            | z            |
|------|--------------|--------------|--------------|
| Rh1  | 1.342018490  | -0.223594627 | -1.705344106 |
| Cl2  | -0.903698993 | 0.064796810  | -2.965051705 |
| Rh3  | -1.512925520 | 0.240693025  | -0.262146754 |
| C4   | 0.361031776  | -0.076687439 | -0.043051414 |
| C5   | 1.466960916  | -0.396082618 | 0.852221019  |
| C6   | 4.013085010  | -1.054470236 | 1.648537032  |
| C7   | 2.499478713  | -0.521704215 | -0.103194484 |
| C8   | 1.687781359  | -0.630288305 | 2.217116872  |
| C9   | 2.982884745  | -0.962127989 | 2.597868336  |
| C10  | 3.791069277  | -0.843602729 | 0.285143253  |
| H11  | 0.886205229  | -0.564989020 | 2.945478702  |
| Atom | x            | y            | z            |
| H12  | 3.205356429  | -1.153201241 | 3.643209857  |
| H13  | 4.591732086  | -0.946004613 | -0.441079706 |
| H14  | 5.013201940  | -1.311187385 | 1.989928932  |
| C15  | -1.878601870 | 0.507102321  | 1.713518669  |
| C16  | -2.433394323 | 0.848570543  | 4.467679961  |
| C17  | -0.968734237 | 1.136161069  | 2.569186574  |
| C18  | -3.089361432 | 0.072940740  | 2.269914081  |
| C19  | -3.358731008 | 0.235966496  | 3.627700187  |
| C20  | -1.237680726 | 1.307264774  | 3.927305167  |
| H21  | -0.022364511 | 1.500788245  | 2.183373265  |
| H22  | -3.848143433 | -0.356036847 | 1.625033332  |
| H23  | -4.309663217 | -0.109735026 | 4.024849868  |

|      |              |              |              |
|------|--------------|--------------|--------------|
| H24  | -0.503770643 | 1.800861627  | 4.559664469  |
| H25  | -2.647007996 | 0.977704225  | 5.524625350  |
| Cl26 | 2.991080091  | -0.486182909 | -3.598447965 |
| Cl27 | -3.927687106 | 0.395543670  | -0.890419494 |
| P28  | 1.701584104  | 2.094483268  | -1.617391541 |
| P29  | -1.299613510 | 2.576939314  | -0.717045721 |
| P30  | 0.848151929  | -2.532581002 | -1.855839964 |
| P31  | -1.733225478 | -2.099534987 | -0.050260875 |
| C32  | -0.906214816 | -2.966044554 | -1.448345849 |
| H33  | -1.000248333 | -4.051517112 | -1.318940367 |
| H34  | -1.483698182 | -2.674174363 | -2.333032047 |
| C35  | 0.122380571  | 3.018478512  | -1.818842762 |
| H36  | -0.214107846 | 2.785587725  | -2.834584081 |
| H37  | 0.305487424  | 4.098379599  | -1.755197588 |
| C38  | 2.755458812  | 2.804873717  | -2.922297444 |
| H39  | 3.753174775  | 2.367634417  | -2.840583979 |
| H40  | 2.805997403  | 3.895435750  | -2.839599532 |
| H41  | 2.356415245  | 2.508537011  | -3.894931464 |
| C42  | 2.418665503  | 2.752530486  | -0.065360861 |
| H43  | 3.424788055  | 2.342654254  | 0.060130190  |
| H44  | 1.823780830  | 2.430062052  | 0.793535868  |
| H45  | 2.470298836  | 3.845586830  | -0.085059420 |
| C46  | -1.136649013 | 3.751559845  | 0.681045423  |
| H47  | -0.193323778 | 3.608036480  | 1.211848624  |
| H48  | -1.951768876 | 3.575358737  | 1.387408329  |
| H49  | -1.186683798 | 4.781505622  | 0.313556846  |
| C50  | -2.688761965 | 3.282066810  | -1.664844508 |
| H51  | -2.465014454 | 4.317020936  | -1.945077331 |
| H52  | -3.597346982 | 3.236603692  | -1.061962792 |
| H53  | -2.850760894 | 2.668500548  | -2.553473655 |
| C54  | 1.857318855  | -3.645917389 | -0.811060646 |
| H55  | 2.896901582  | -3.556814902 | -1.139304371 |
| H56  | 1.535467878  | -4.687827326 | -0.904298461 |
| H57  | 1.811870967  | -3.337879499 | 0.236865740  |
| C58  | -1.048745520 | -2.853358337 | 1.468756113  |
| H59  | 0.013413853  | -2.621652723 | 1.565934353  |
| H60  | -1.187149696 | -3.938982181 | 1.462613817  |
| H61  | -1.569720471 | -2.423149731 | 2.328972417  |
| C62  | -3.419269872 | -2.791209871 | -0.129236860 |
| H63  | -3.377208952 | -3.885410504 | -0.131840866 |
| H64  | -3.917126502 | -2.417285321 | -1.025624443 |
| H65  | -3.992215988 | -2.450287738 | 0.735976800  |
| C66  | 1.005584083  | -3.228400206 | -3.532033518 |
| H67  | 2.040635329  | -3.111691317 | -3.859405060 |
| H68  | 0.376976969  | -2.639718324 | -4.204897619 |
| H69  | 0.704380876  | -4.280896564 | -3.549890196 |

**Thermodynamic properties (298.15 K):**  $ZPE = 1377.33$  kJmol<sup>-1</sup>,  $H^{\circ} = -3863.047647$  au,  $S^{\circ} = 1033.44$  Jmol<sup>-1</sup>K<sup>-1</sup>,  $G^{\circ} = -3863.165004$ ,  $C_v = 673.71$  Jmol<sup>-1</sup>K<sup>-1</sup>.

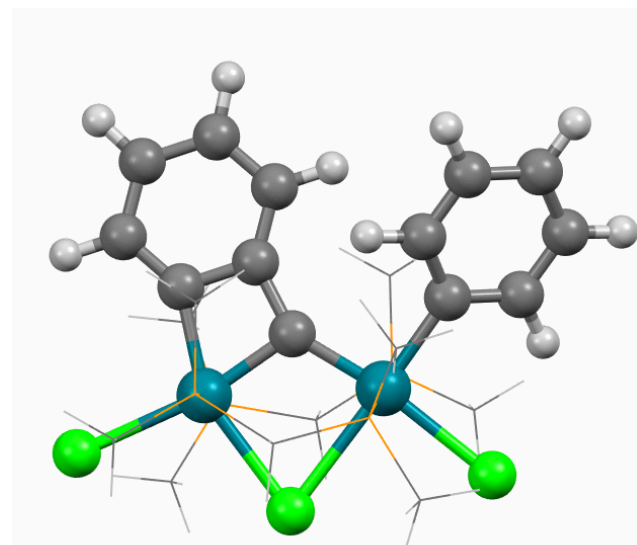

**Figure S4.** View of molecular geometry perpendicular to the equatorial coordination plane of optimised geometry for  $[\text{Rh}_2(\mu\text{-CC}_6\text{H}_4)(\text{C}_6\text{H}_5)\text{Cl}_2(\mu\text{-dmpm})_2]$  (DFT:  $\omega\text{BP97X-D/LANL2DZ}$ , gas phase) with dmpm ligands simplified.

## Mechanistic Conjecture

From the outset it should be noted that the following mechanistic conjecture, whilst plausible, has yet to be substantiated. Nevertheless, some observations are noteworthy in allowing us to exclude some potential pathways.

The formation of **2** involves both rhodium centres being oxidised from Rh<sup>I</sup> to Rh<sup>III</sup>. Whilst oxidation of the first is a result of the benzyne cyclo-addition, the oxidation of the second which involves installation of a  $\sigma$ -phenyl ligand remains obscure. Scheme S1 presents what we believe to be a possible route by which **2** might arise.

According to the original Kobayashi protocol,<sup>[8]</sup> fluoride results in desilylation of 2-Me<sub>3</sub>SiC<sub>6</sub>H<sub>4</sub>OTf via an intermediate fluorosilicate  $[\text{FMe}_3\text{SiC}_6\text{H}_4\text{OTf}]^-$ <sup>[9]</sup>. Departure of the fluorosilane FSiMe<sub>3</sub> is considered to be rapidly followed by dissociation of the triflate to generate benzyne, such that the 2-triflatophenyl anion does not accumulate sufficiently to be protonated by adventitious water. We may therefore presume that both benzyne and phenyltriflate are potentially available when an excess of the TBAF/Me<sub>3</sub>SiC<sub>6</sub>H<sub>4</sub>OTf reagent is employed.

Formation of the cyclometallated benzyldiyne ligand is consistent with the formal cycloaddition of benzyne across one Rh=C bond however the intimate details of how this occurs are not clear. Three alternative routes seem plausible. Firstly, a simple [2+2] cyclo-addition would mimic the behaviour of benzyne with other unsaturated reagents.

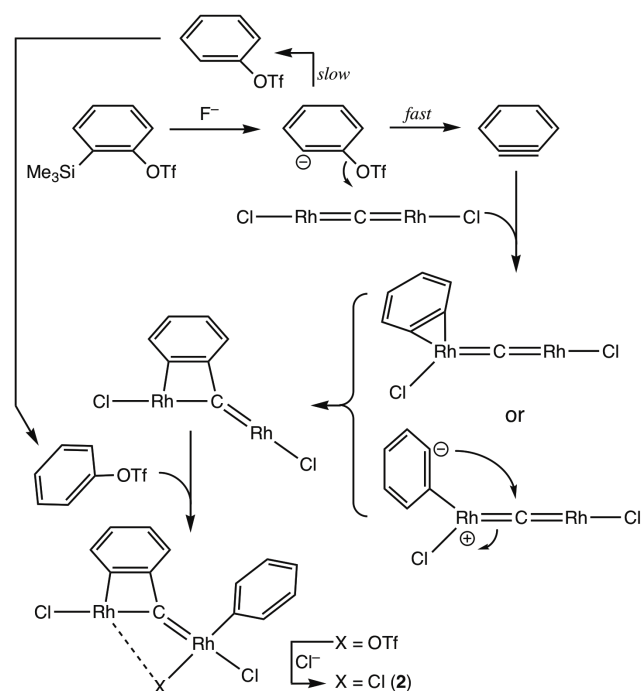

**Scheme S1.** Mechanistic proposal for the formation of **2**. Only equatorial ligand sets shown,  $\mu$ -dppm ligands omitted.

The presence of rhodium, however raises the possibility that the metal might play a more significant role. Although benzyne complexes have not previously been prepared via actual addition of benzyne (or  $\text{Me}_3\text{SiC}_6\text{H}_4\text{OTf}$ ) to an unsaturated metal centre, this is not unreasonable. Coordination of the benzyne *cis* to the  $\text{Rh}=\text{C}$  could then be followed by coupling in a manner completely analogous to alkyne or ene-yne metathesis. Finally, a two-step dipolar process might be envisaged in which a zwitterionic 2-rhodaphenyl carbanion collapses by nucleophilic attack at the bridging carbido ligand.

The second benzyne mode of installation in the form of a  $\sigma$ -phenyl ligand remains equivocal however the following observations are germane, suggesting that slow hydrolysis of  $\text{Me}_3\text{SiC}_6\text{H}_4\text{OTf}$  to afford  $\text{PhOTf}$  may provide the source of the  $\sigma$ -phenyl ligand.

- i) The rhodium carbido complex **1** does not react with  $\text{Me}_3\text{SiC}_6\text{H}_4\text{OTf}$  until fluoride is added, i.e., oxidative addition to provide an intermediate 2-silyphenyl ligand may be excluded as the first step.
- ii) This does not preclude the possible oxidative addition of  $\text{PhOTf}$  (from gradual hydrolysis of  $[\text{FMe}_3\text{SiC}_6\text{H}_4\text{OTf}]^-$ ) or  $\text{Me}_3\text{SiC}_6\text{H}_4\text{OTf}$  to the remaining rhodium(I) centre ONCE carbido-benzyne coupling has occurred.
- iii) Conversion of coordinate triflate to chloride presumably occurs via scrambling.
- iv) Complex **1** is unreactive towards the combination of fluoride and trimethylsilanes

devoid of triflate substituents, e.g.,  $\text{PhSiMe}_3/\text{TBAT}$ .

- v) The  $^{31}\text{P}\{^1\text{H}\}$  spectra of crude **2** and **4** do not change upon chromatography ( $\text{CH}_2\text{Cl}_2$ , silica gel).
- vi) Addition of excess chloride ( $[\text{nBu}_4\text{N}]\text{Cl}$ ) does not increase the yield of **2** indicating that the low yield is not a corollary of requisite halide scrambling.

## References

- 1 Agilent, Agilent Technologies Ltd, Yarnton, Oxfordshire, England, 2014.
- 2 (a) G. Sheldrick, *Acta Crystallogr. Sect. A: Found. Crystallogr.* 2008, **64**, 112-122; (b) G. M. Sheldrick, *Acta Crystallogr. Sect. C: Cryst. Struct. Commun.* 2015, **71**, 3-8.
- 3 (a) C. F. Macrae, P. R. Edgington, P. McCabe, E. Pidcock, G. P. Shields, R. Taylor, M. Towler, J. van de Streek, *J. Appl. Crystallogr.* 2006, **39**, 453-457; (b) C. F. Macrae, I. J. Bruno, J. A. Chisholm, P. R. Edgington, P. McCabe, E. Pidcock, L. Rodriguez-Monge, R. Taylor, J. van de Streek, P. A. Wood, *J. Appl. Crystallogr.* 2008, **41**, 466-470.
- 4 H. J. Barnett and A. F. Hill, *Chem. Commun.*, 2019, **55**, 1734-1737.
- 5 *Spartan 18*<sup>®</sup> (2018) Wavefunction, Inc., 18401 Von Karman Ave., Suite 370 Irvine, CA 92612 U.S.A
- 6 J.-D. Chai and M. Head-Gordon, *J. Chem. Phys.*, 2008, **128**, 0841061-18410615; (b) J.-D. Chai and M. Head-Gordon, *Phys. Chem. Chem. Phys.*, 2008, **10**, 6615-6620.
- 7 (a) P. J. Hay and W.R. Wadt, *J. Chem. Phys.*, 1985, **82**, 270-283. (b) W. R. Wadt and P. J. Hay, *J. Chem. Phys.* 1985, **82**, 284-298. (c) P. J. Hay, W. R. Wadt, *J. Chem. Phys.*, 1985, **82**, 299-310.
- 8 W. J. Hehre, R. Ditchfeld and J. A. Pople, *J. Chem. Phys.*, 1972, **56**, 2257-2261.
- 9 Y. Himeshima, T. Sonada and H. Kobayashi, *Chem. Lett.*, 1983, 1211-1214.
- 10 S. Liu, Y. Li and Y. Lan, *Eur. J. Org. Chem.* **2017**, 6349-6353.

## Dalton Transactions

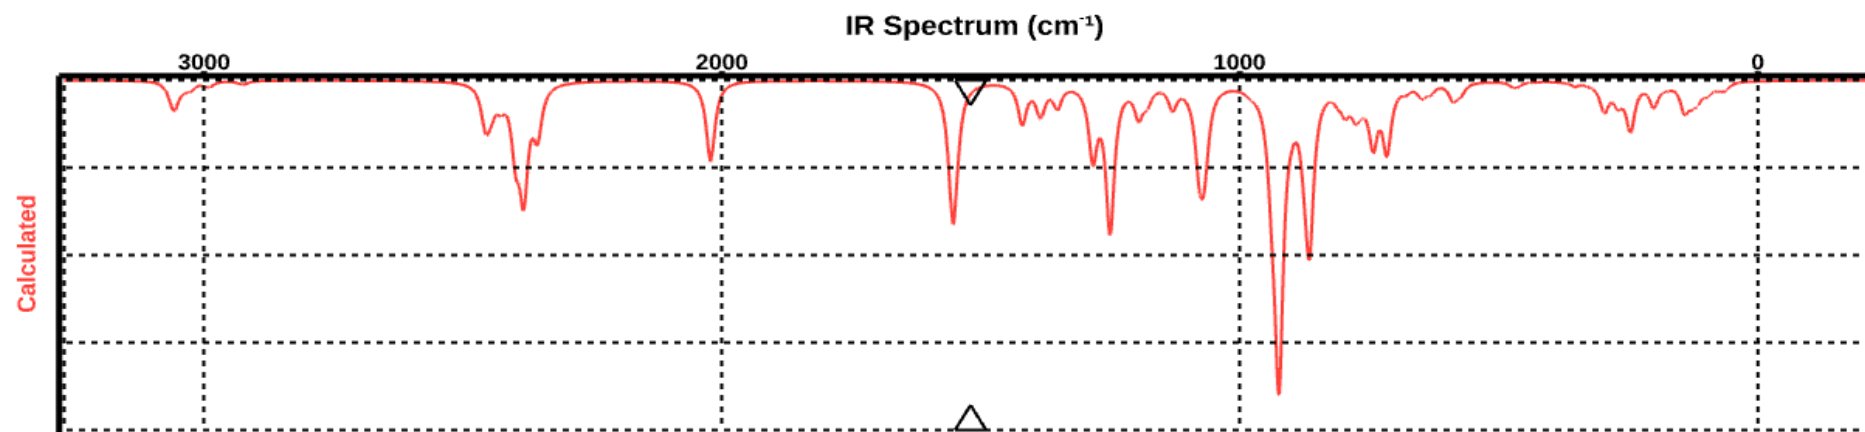

Figure S5. Calculated ( $\omega$ B97X-D/6-316\*/LANL2D $\zeta$ ) Infrared Spectrum of  $[\text{Rh}_2(\mu\text{-CC}_6\text{H}_4)\text{HCl}_2(\mu\text{-dHpm})_2]$ .

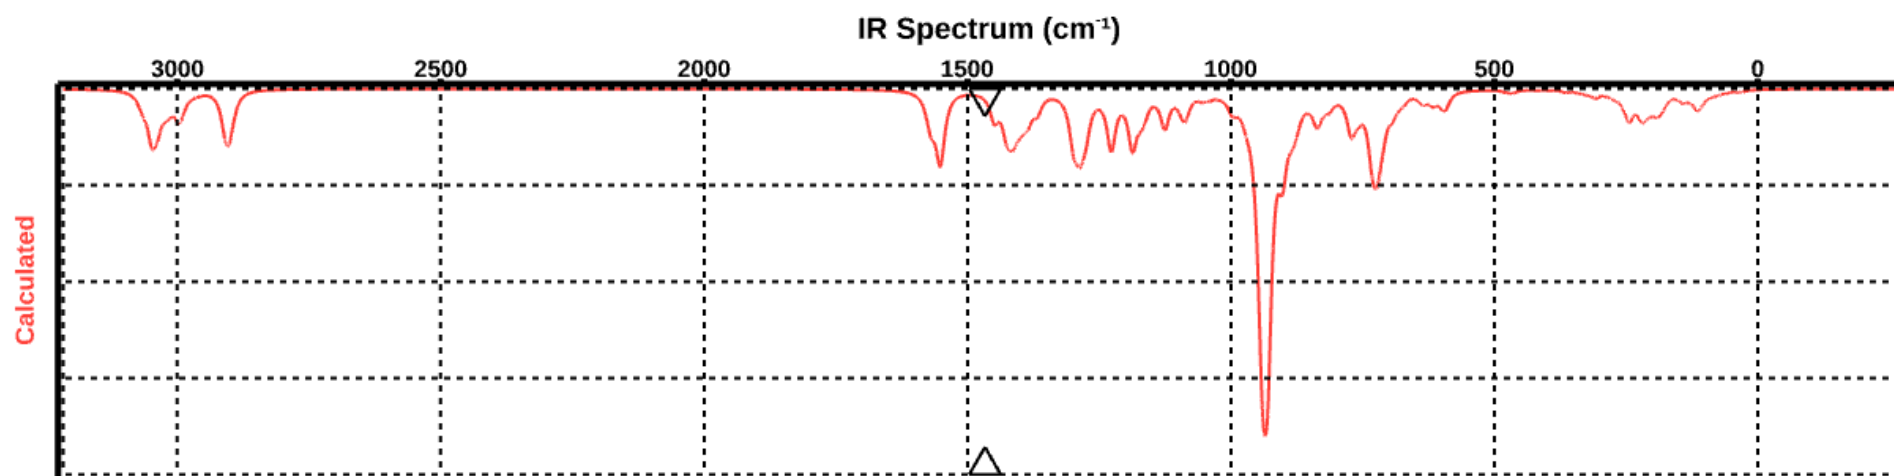

Figure S6. Calculated ( $\omega$ B97X-D/6-316\*/LANL2D $\zeta$ ) Infrared Spectrum of  $[\text{Rh}_2(\mu\text{-CC}_6\text{H}_4)(\text{C}_6\text{H}_5)\text{Cl}_2(\mu\text{-dmpm})_2]$ .

## Dalton Transactions

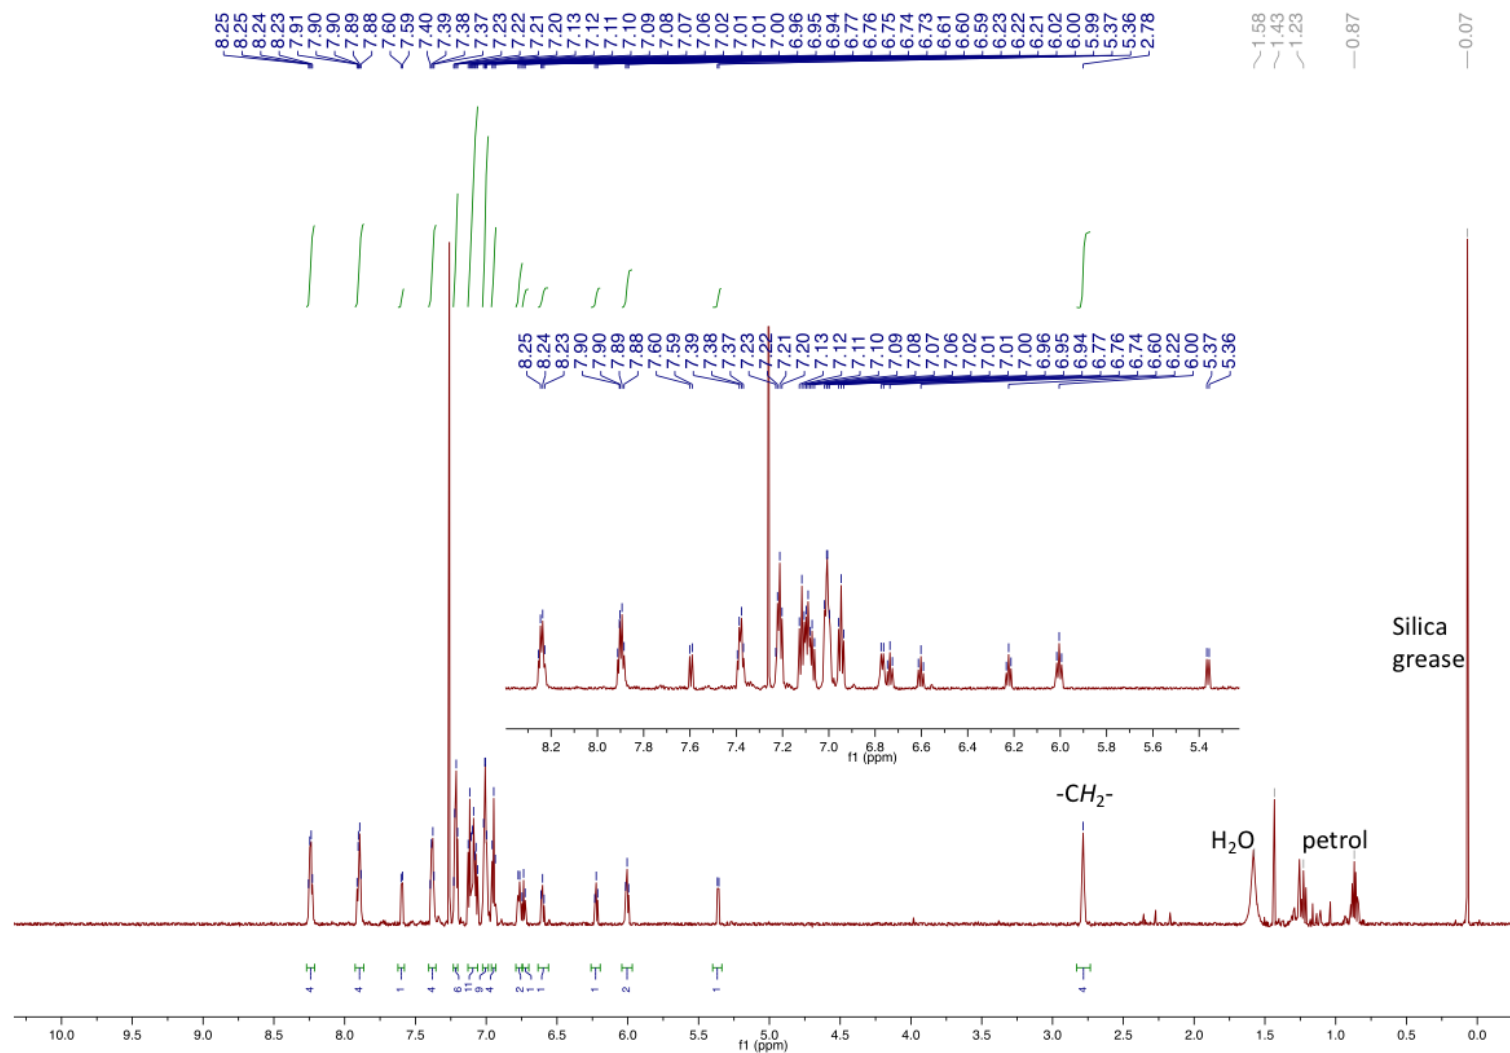

Figure S7.  $^1\text{H}$  NMR (400 MHz,  $\text{CDCl}_3$ , 298 K,  $\delta$ ) of  $[\text{Rh}_2(\mu\text{-}^{13}\text{C}_6\text{H}_4)(\mu\text{-Cl})(\text{C}_6\text{H}_5)\text{Cl}_2(\mu\text{-dppm})_2]$  (2).

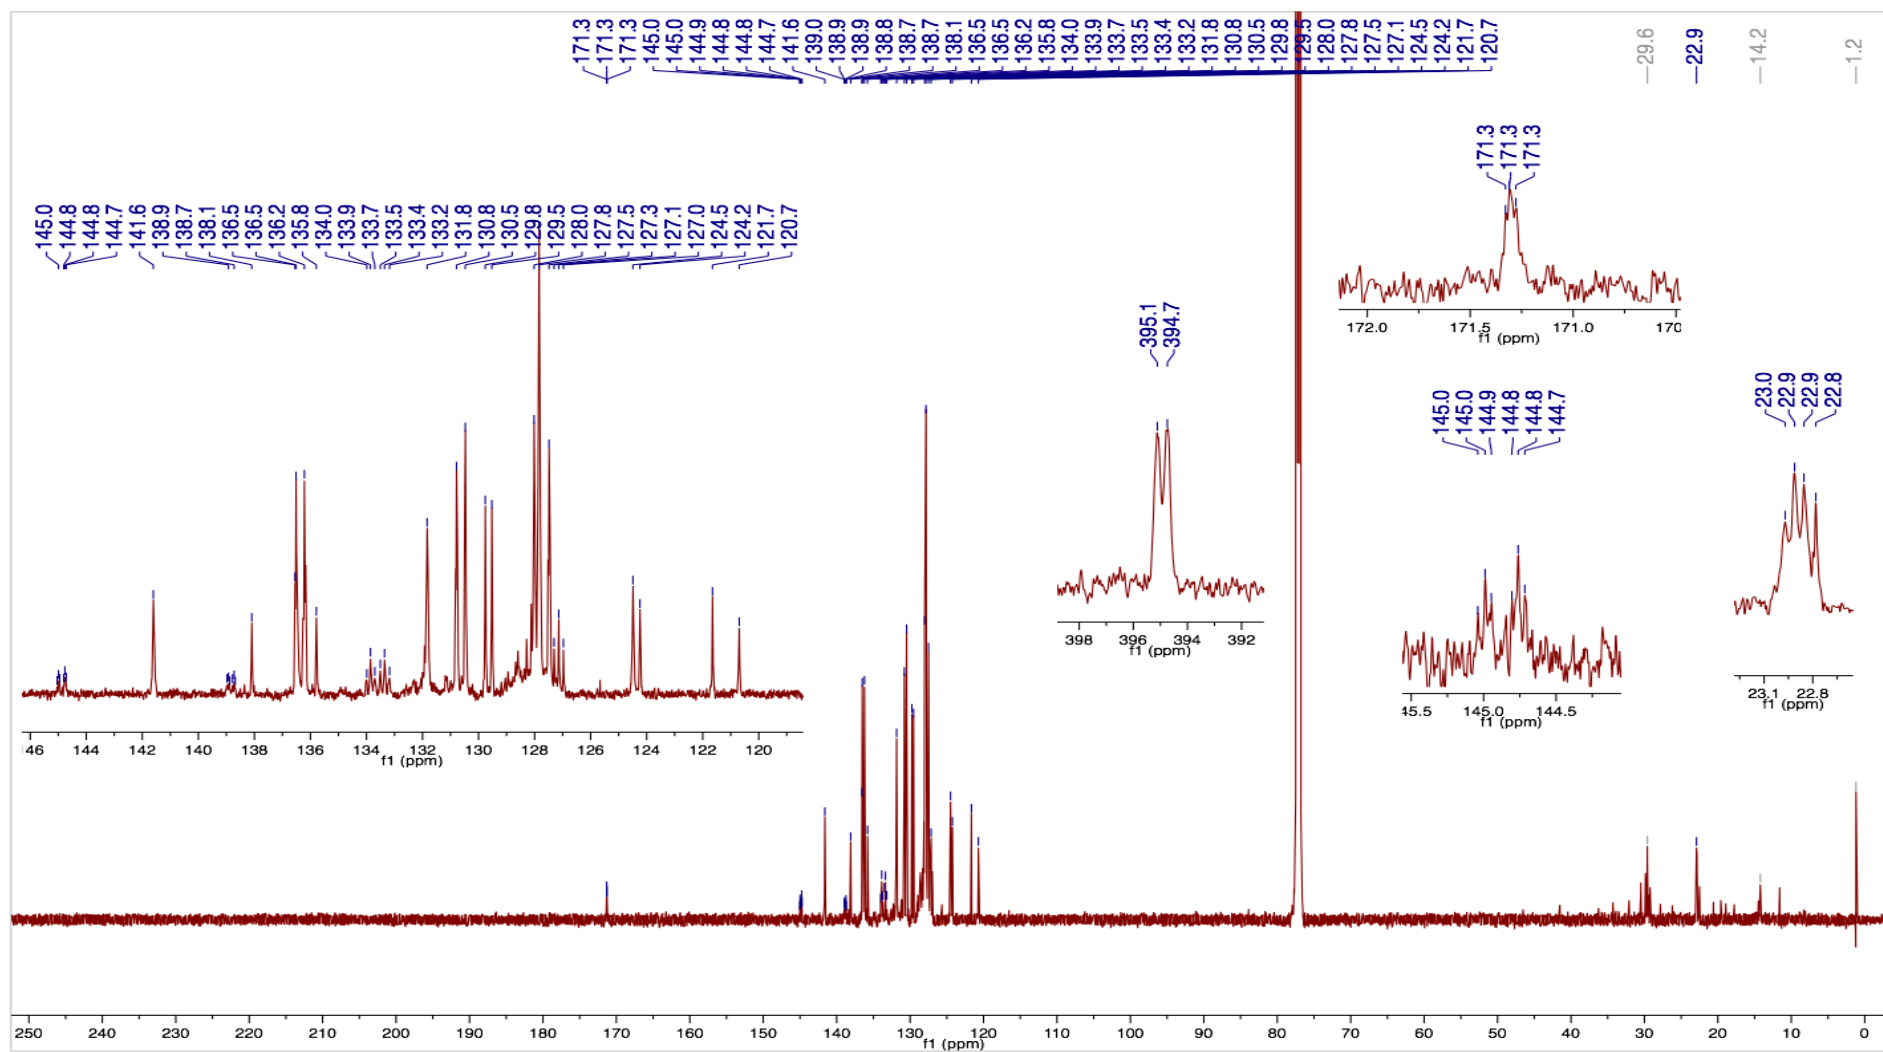

Figure S8.  $^{13}\text{C}\{^1\text{H}\}$  NMR (151 MHz,  $\text{CDCl}_3$ , 298 K,  $\delta$ ) of  $[\text{Rh}_2(\mu\text{-}^{13}\text{C}_6\text{H}_4)(\mu\text{-Cl})(\text{C}_6\text{H}_5)\text{Cl}_2(\mu\text{-dppm})_2]$  (2).



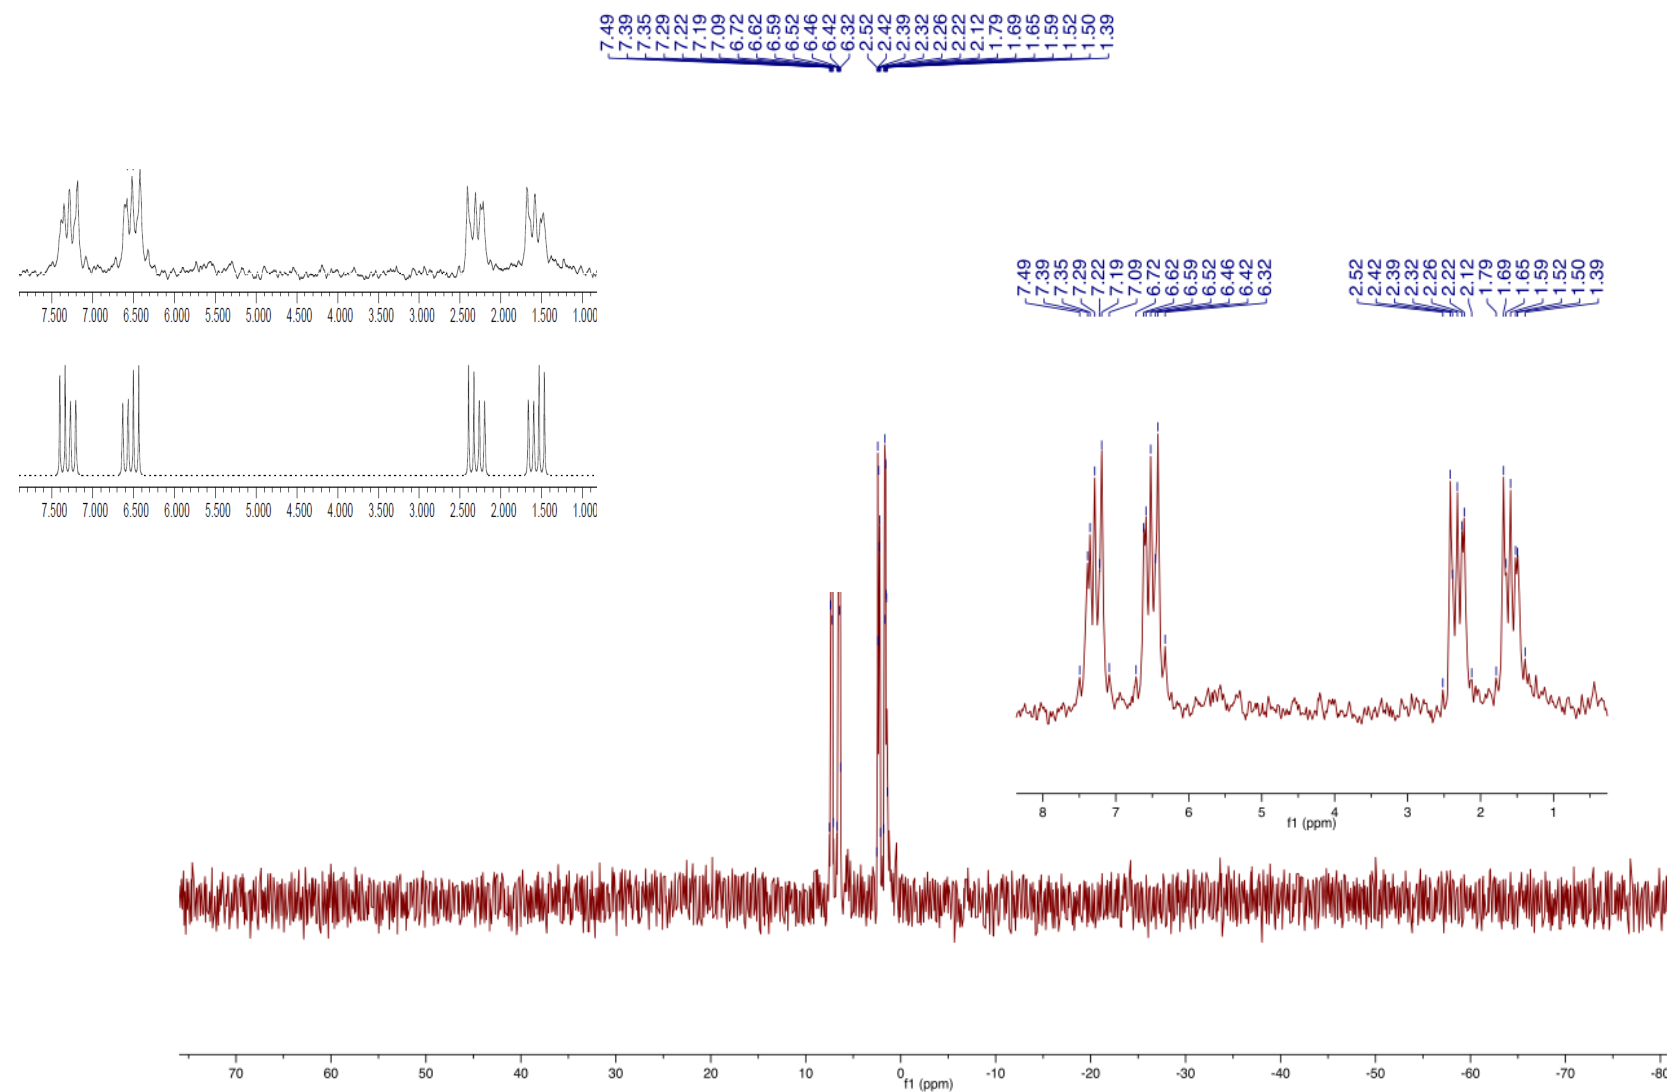

Figure S9.  $^{31}\text{P}\{^1\text{H}\}$  NMR (162 MHz,  $\text{CDCl}_3$ , 298 K,  $\delta$ ) of  $[\text{Rh}_2(\mu\text{-}^{13}\text{C}_6\text{H}_4)(\mu\text{-Cl})(\text{C}_6\text{H}_5)\text{Cl}_2(\mu\text{-dppm})_2]$  (2) (left inset – simulated spin system developed using gNMR).

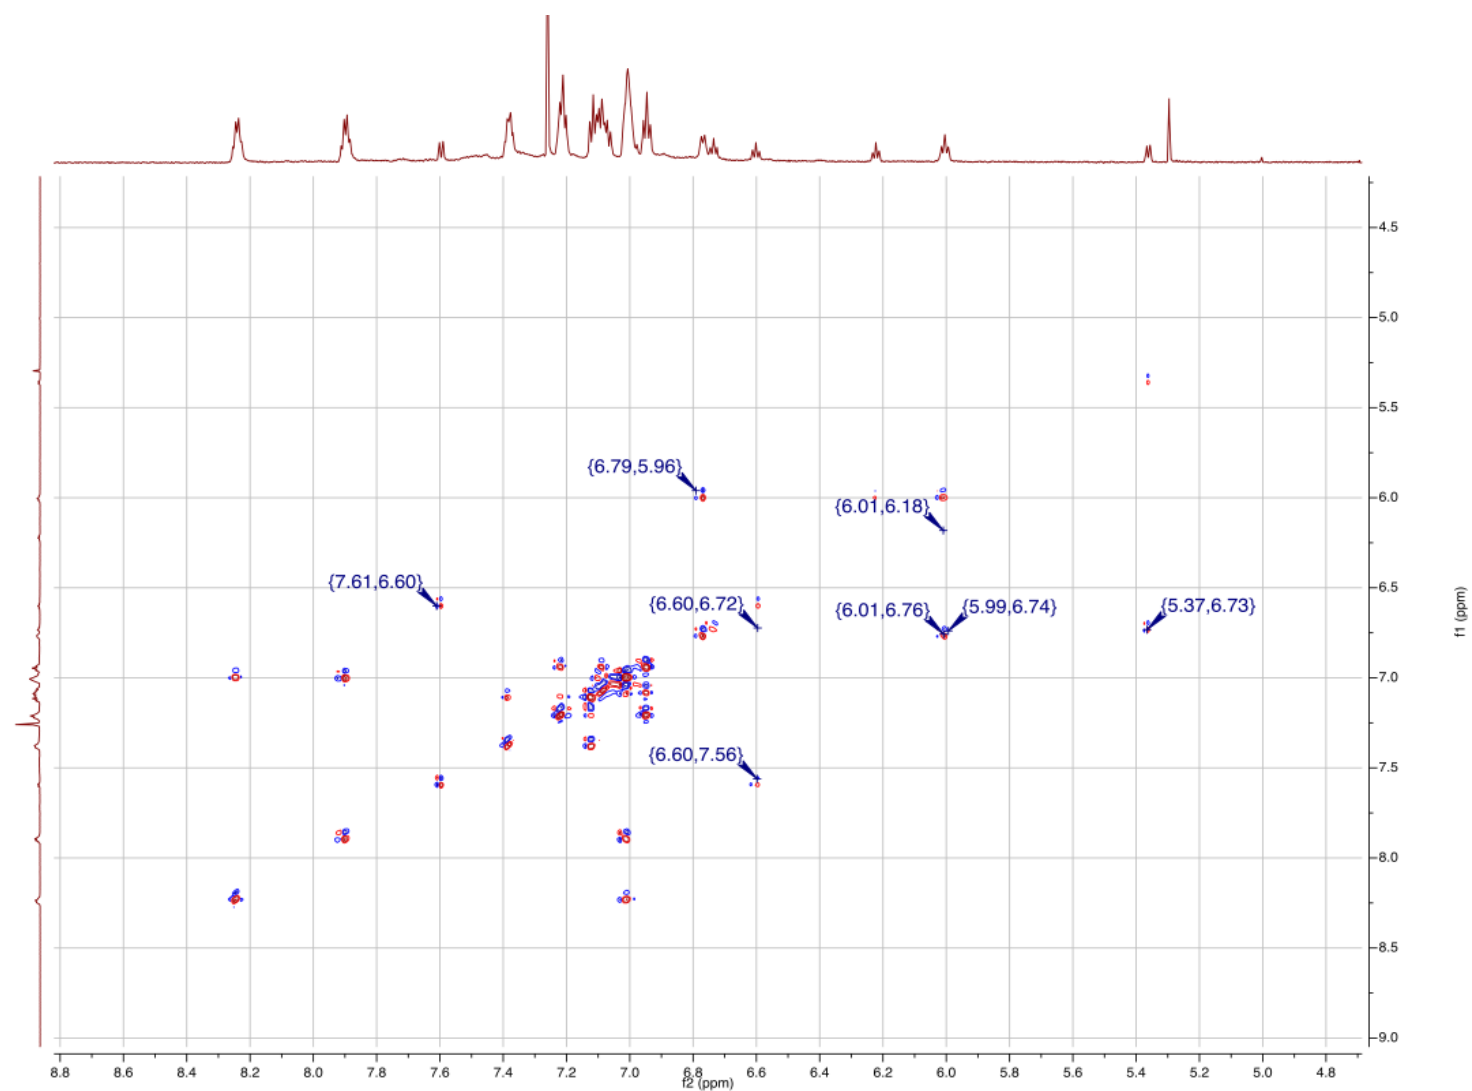

**Figure S10.**  $^1\text{H}$ - $^1\text{H}$  COSY NMR Spectrum (600 MHz,  $\text{CDCl}_3$ , 298 K,  $\delta$ ) of  $[\text{Rh}_2(\mu\text{-CC}_6\text{H}_4)(\mu\text{-Cl})(\text{C}_6\text{H}_5)\text{Cl}_2(\mu\text{-dppm})_2]$  (2).

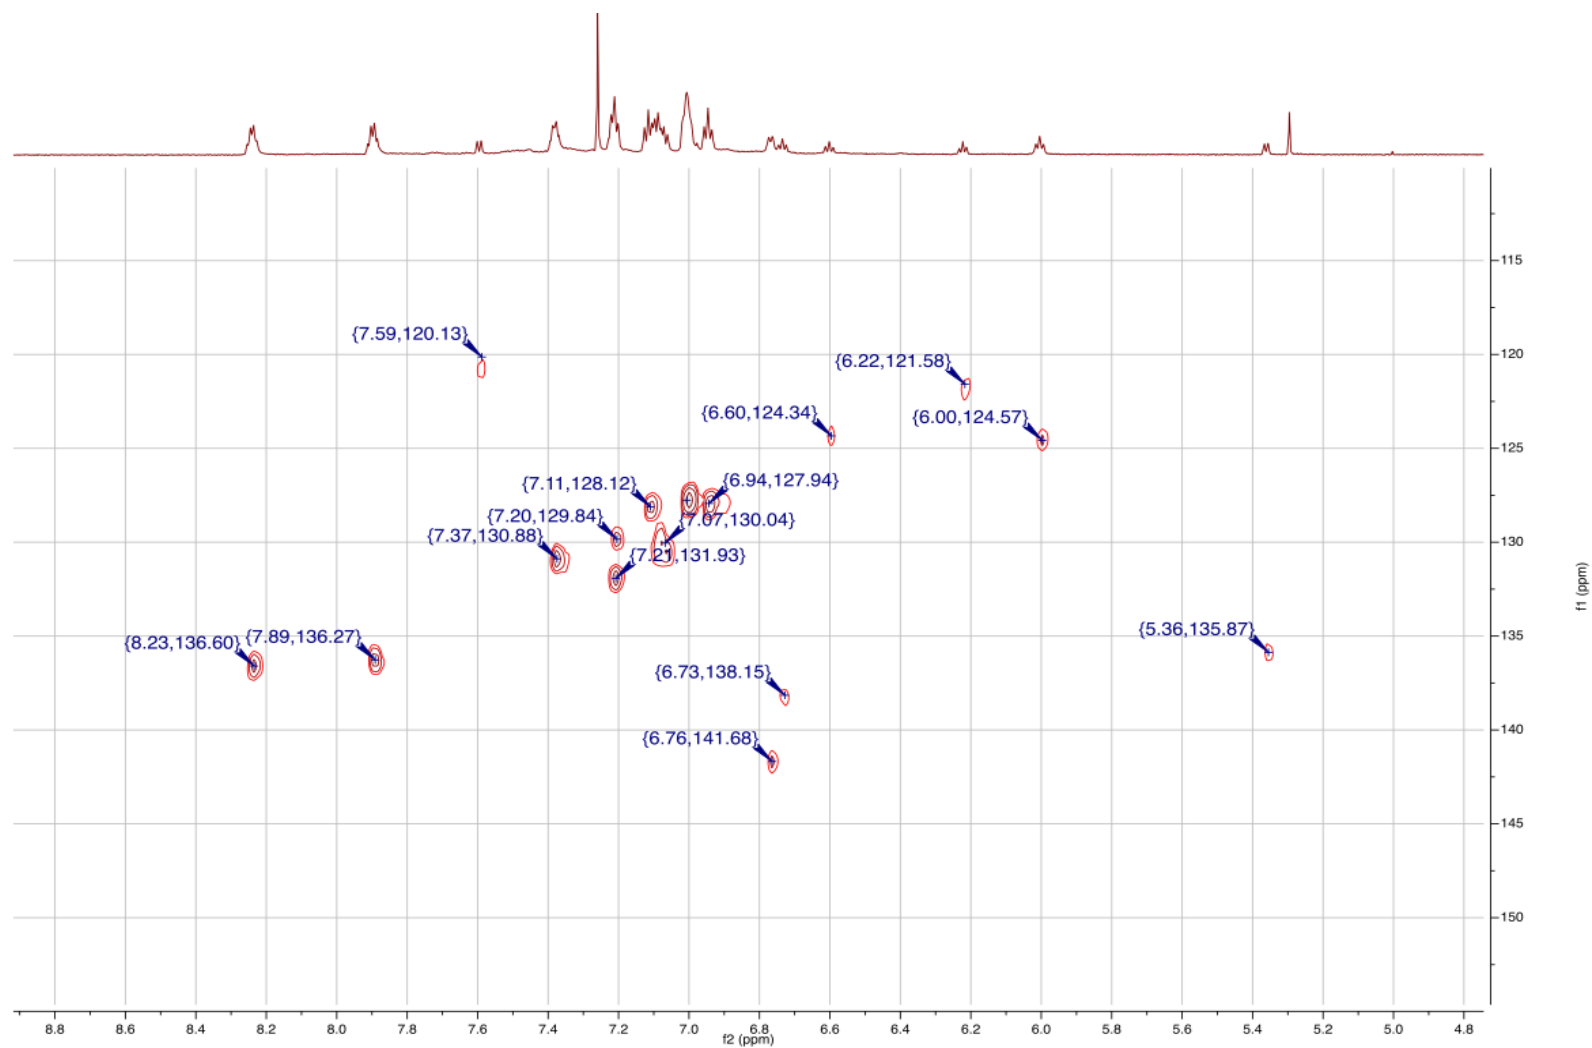

**Figure S11.**  $^1\text{H}$ - $^{13}\text{C}$  HSQC NMR (600 MHz,  $\text{CDCl}_3$ , 298 K,  $\delta$ ) of  $[\text{Rh}_2(\mu\text{-CC}_6\text{H}_4)(\mu\text{-Cl})(\text{C}_6\text{H}_5)\text{Cl}_2(\mu\text{-dppm})_2]$  (2).

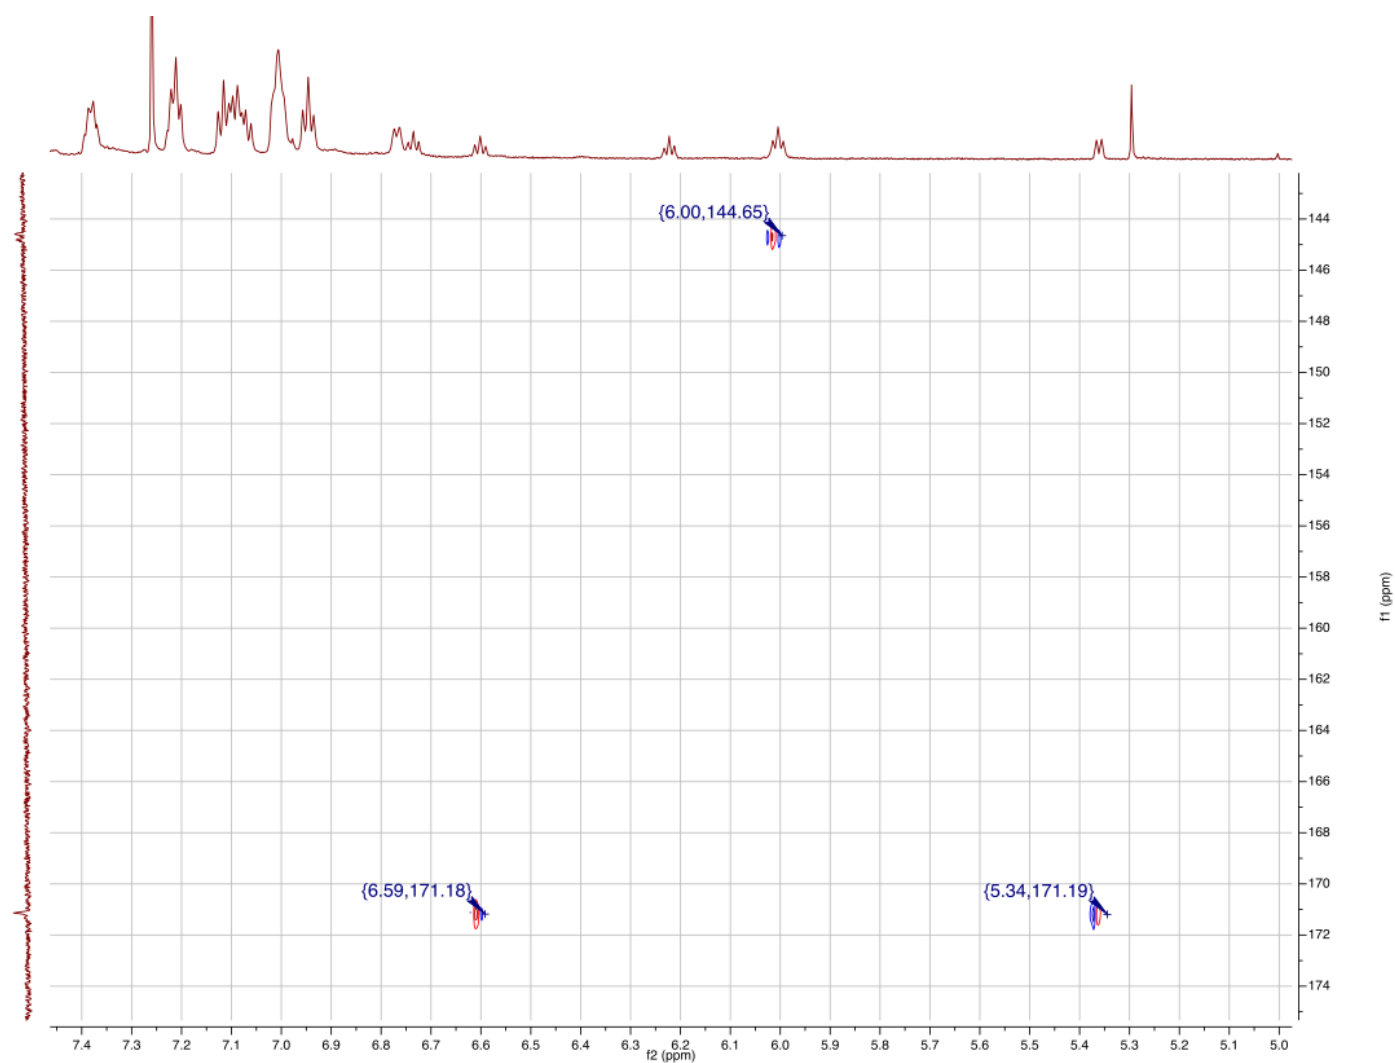

**Figure S12.**  $^1\text{H}$ - $^{13}\text{C}$  HMBC NMR Extract (600 MHz,  $\text{CDCl}_3$ , 298 K,  $\delta$ ) of  $[\text{Rh}_2(\mu\text{-}^{13}\text{C}_6\text{H}_4)(\mu\text{-Cl})(\text{C}_6\text{H}_5\text{Cl}_2(\mu\text{-dppm})_2)]$  (2).

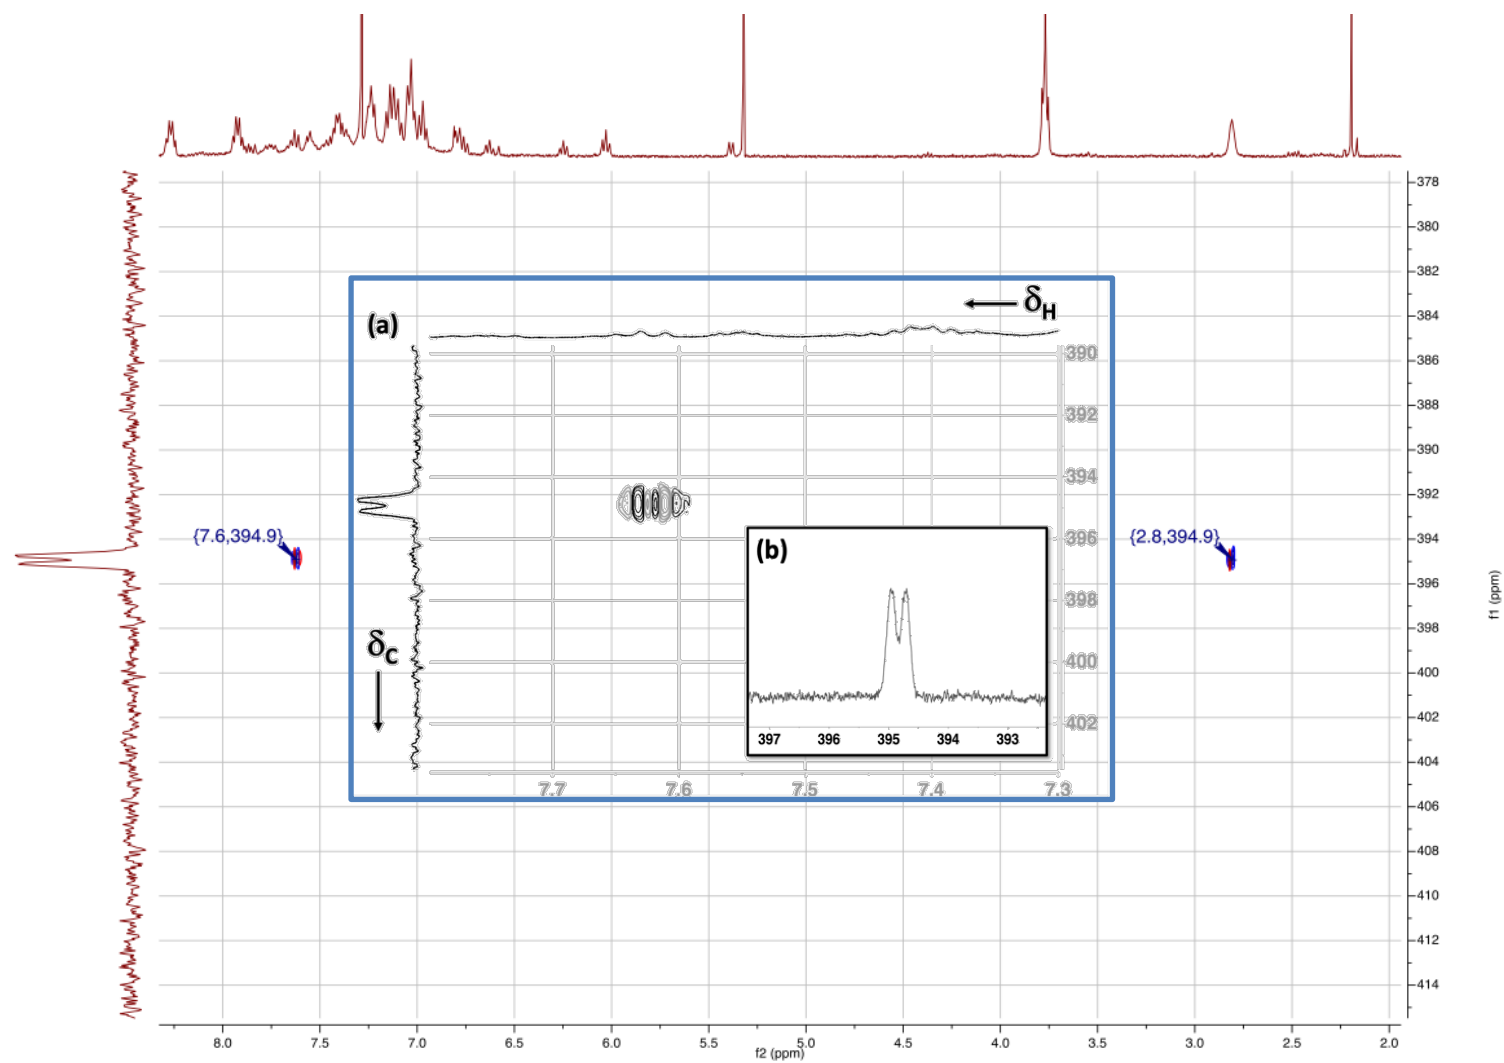

**Figure S13.**  $^1\text{H}$ - $^{13}\text{C}$  HMBC NMR Extract (600 M Hz,  $\text{CDCl}_3$ , 298 K,  $\delta$ ) of  $[\text{Rh}_2(\mu\text{-}^{13}\text{C}_6\text{H}_4)(\mu\text{-Cl})(\text{C}_6\text{H}_5)\text{Cl}_2(\mu\text{-dppm})_2]$  (2) - 50%  $^{13}\text{C}$  enriched at  $\mu\text{-C}$ .

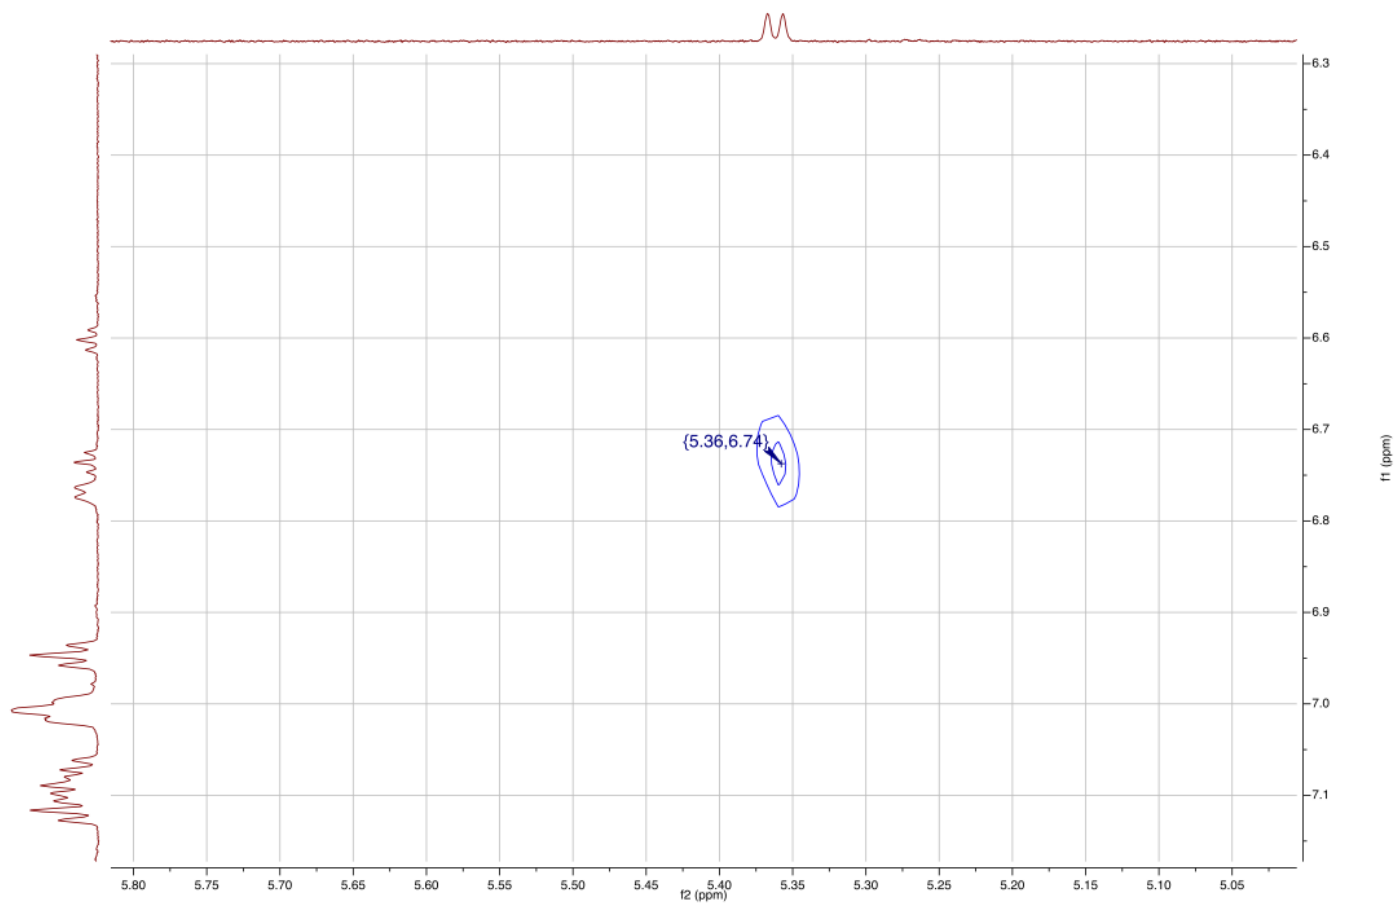

**Figure S14.**  $^1\text{H}$ - $^1\text{H}$  ROESY NMR Extract (600 MHz,  $\text{CDCl}_3$ , 298 K,  $\delta$ ) of  $[\text{Rh}_2(\mu\text{-CC}_6\text{H}_4)(\mu\text{-Cl})(\text{C}_6\text{H}_5)\text{Cl}_2(\mu\text{-dppm})_2]$  (2).

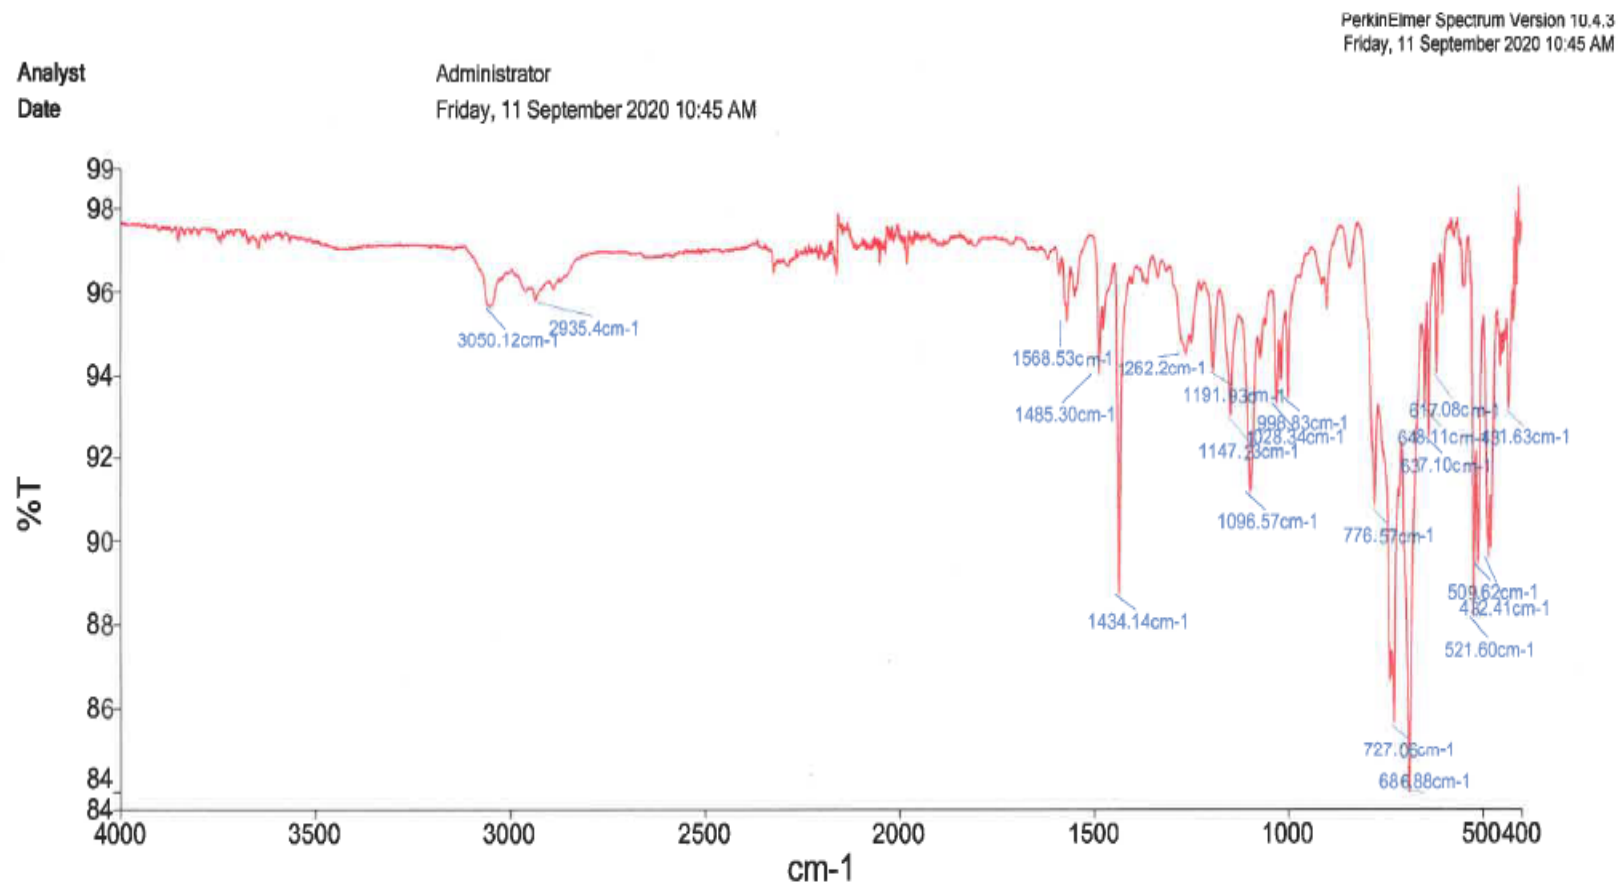

Figure S15. ATRIR Spectrum of  $[\text{Rh}_2(\mu\text{-CC}_6\text{H}_4)(\mu\text{-Cl})(\text{C}_6\text{H}_5)\text{Cl}_2(\mu\text{-dppm})_2]$  (2).

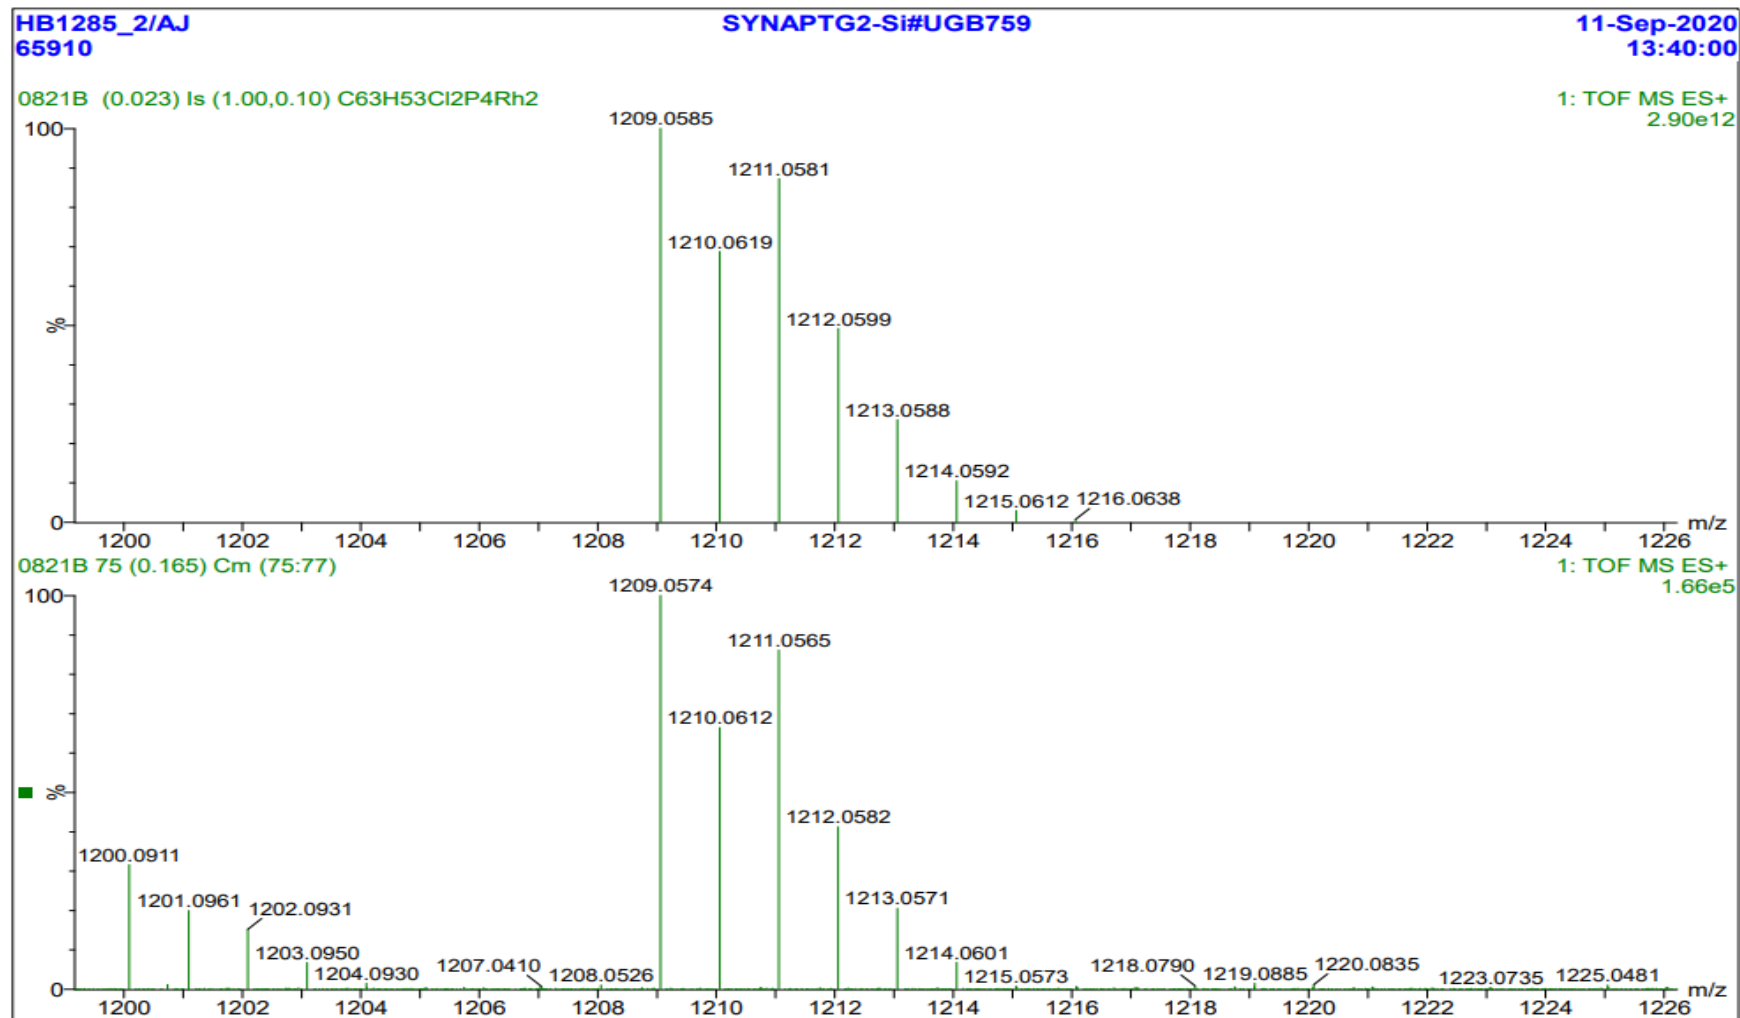

Figure S16. ESI-MS isotopic distribution and model of  $[\text{Rh}_2(\mu\text{-CC}_6\text{H}_5)(\mu\text{-Cl})(\text{C}_6\text{H}_5)\text{Cl}_2(\mu\text{-dppm})_2] (2)$ .  $[\text{M-Cl}]^+$



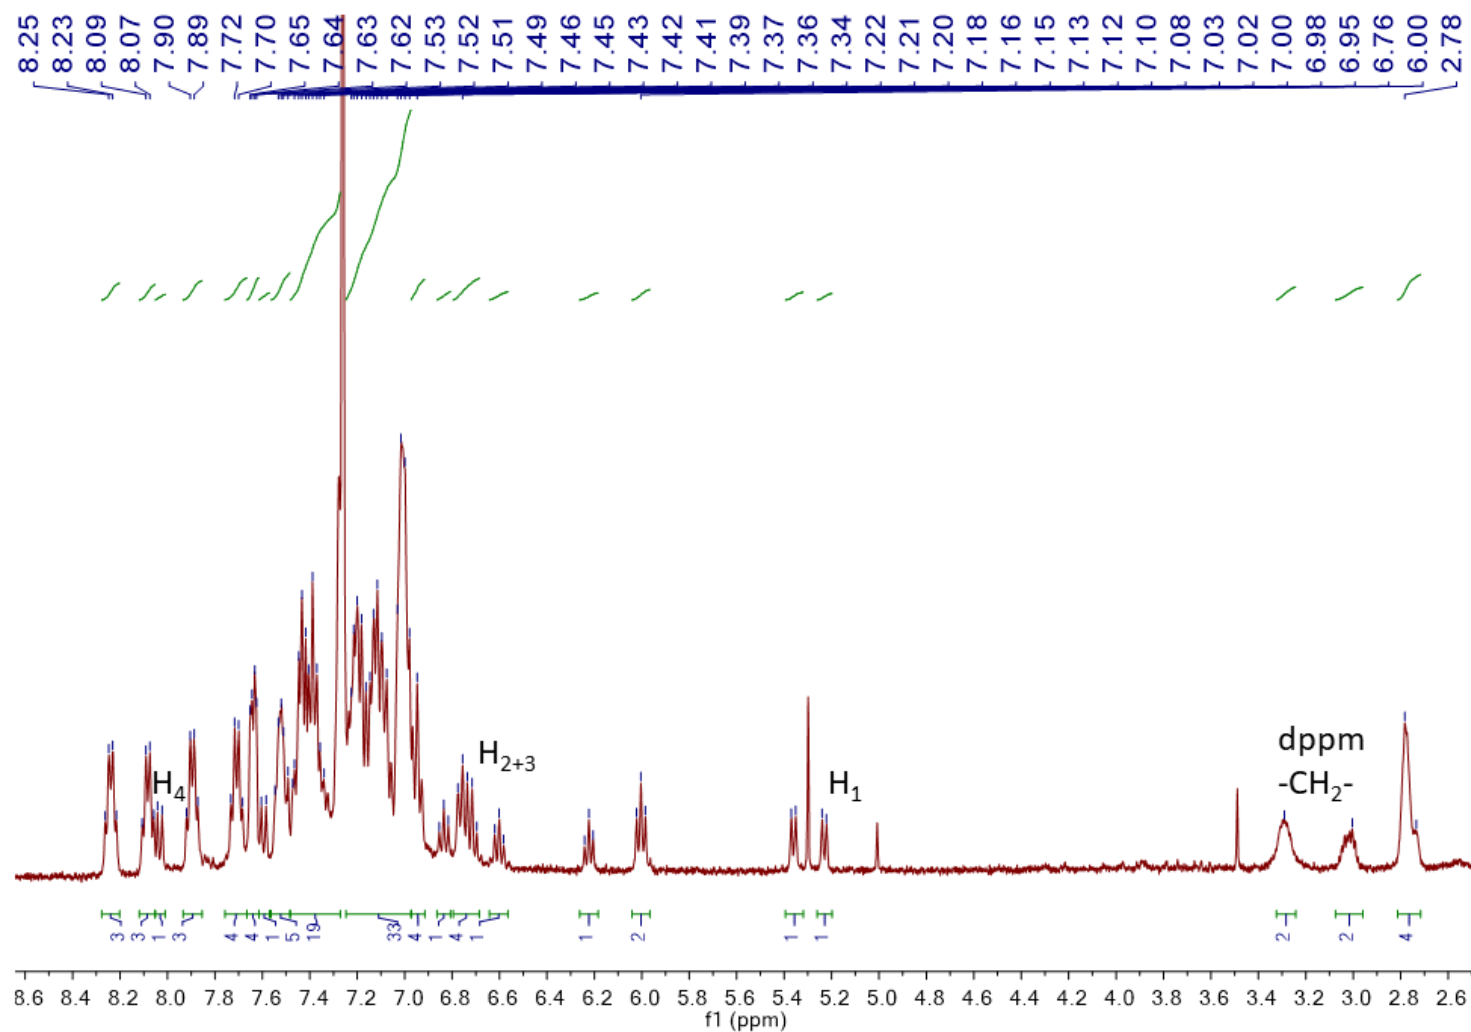

**Figure S17.**  $^1\text{H}$  NMR (400 MHz,  $\text{CDCl}_3$ , 298 K,  $\delta$ ) inset of  $[\text{Rh}_2(\mu\text{-CC}_6\text{H}_4)(\mu\text{-Cl})(\text{R})\text{Cl}_2(\mu\text{-dppm})_2]$  ( $\text{R} = \text{C}_6\text{H}_5$ , 2, Cl 4).

## Dalton Transactions

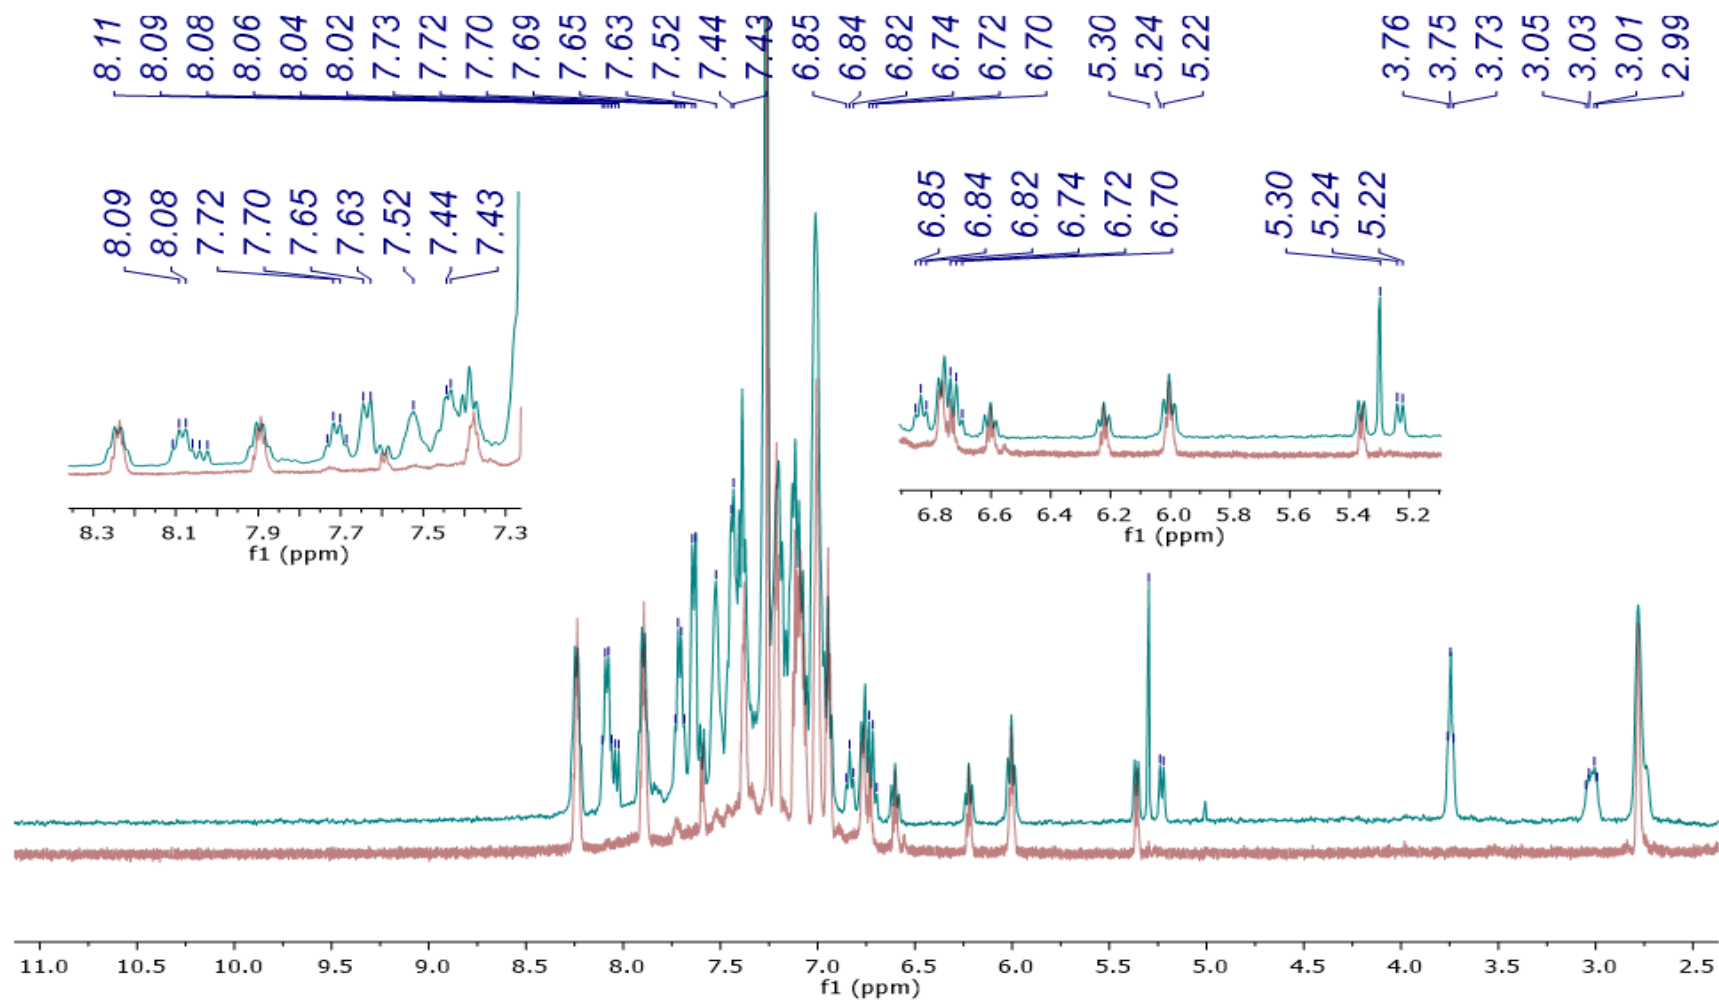

Figure S18.  $^1\text{H}$  NMR (400 MHz,  $\text{CDCl}_3$ , 298 K,  $\delta$ ) extract overlay of  $[\text{Rh}_2(\mu\text{-CC}_6\text{H}_4)(\mu\text{-Cl})(\text{R})\text{Cl}_2(\mu\text{-dppm})_2]$  ( $\text{R} = \text{C}_6\text{H}_5$ , 2, Cl 4, cyan) with 2 (red).

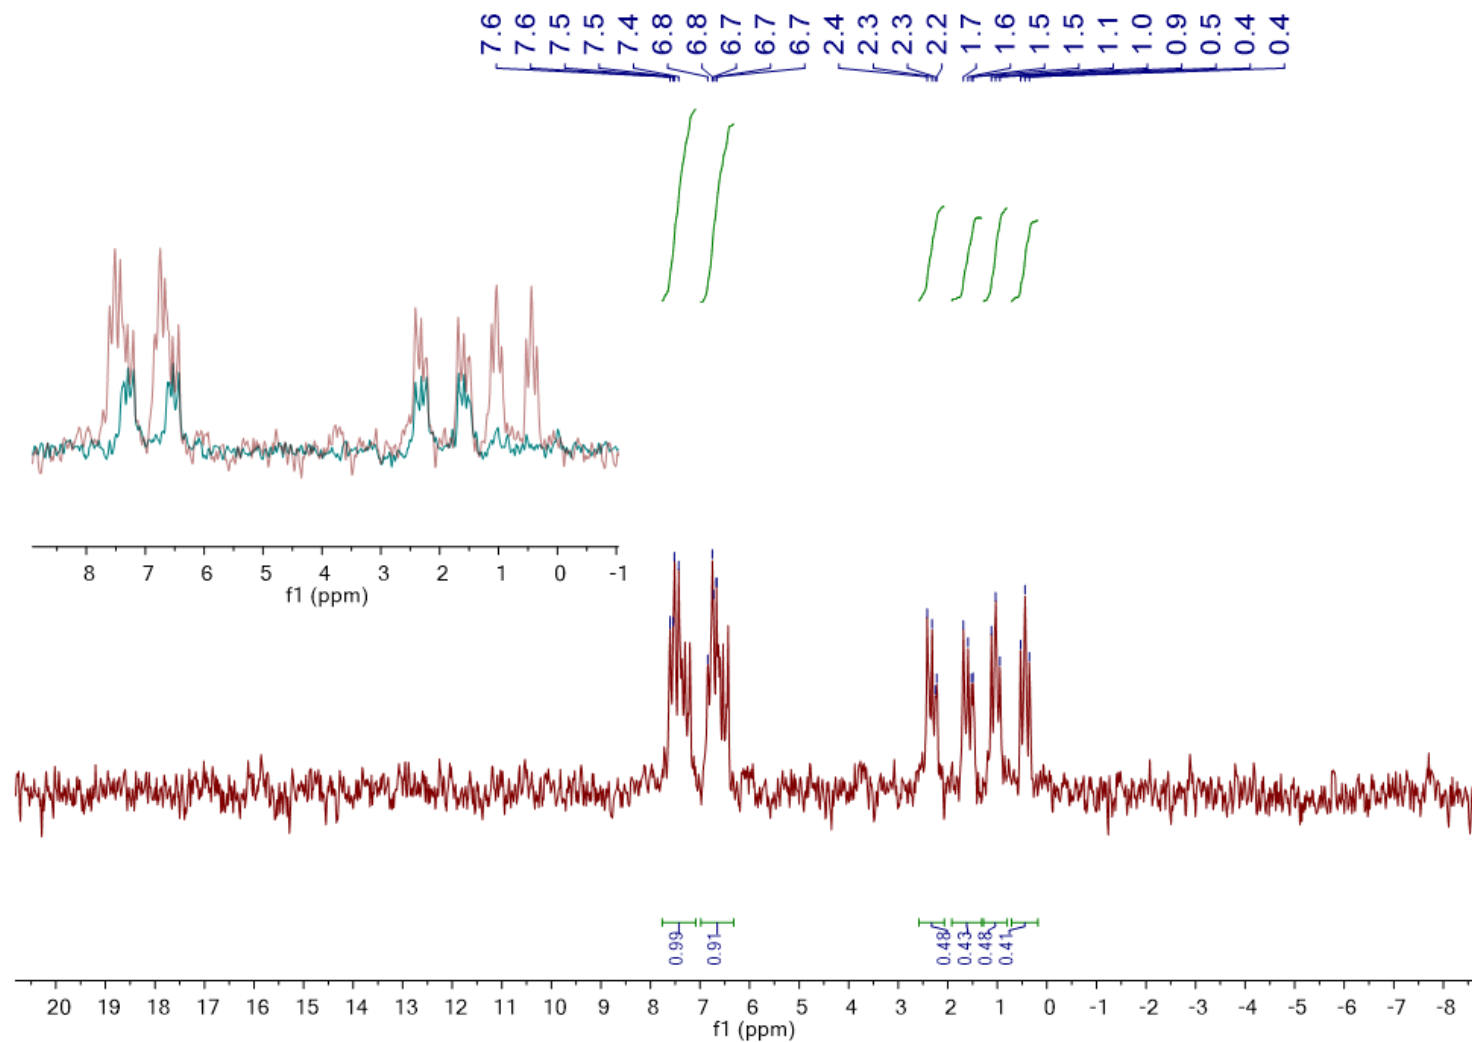

**Figure S19.**  $^{31}\text{P}\{^1\text{H}\}$  NMR (162 MHz,  $\text{CDCl}_3$ , 298 K,  $\delta$ ) of  $[\text{Rh}_2(\mu\text{-CC}_6\text{H}_4)(\mu\text{-Cl})(\text{R})\text{Cl}_2(\mu\text{-dppm})_2]$  ( $\text{R} = \text{C}_6\text{H}_5$  **2**, **Cl 4**). Inset: overlay (red) with **2** (cyan).

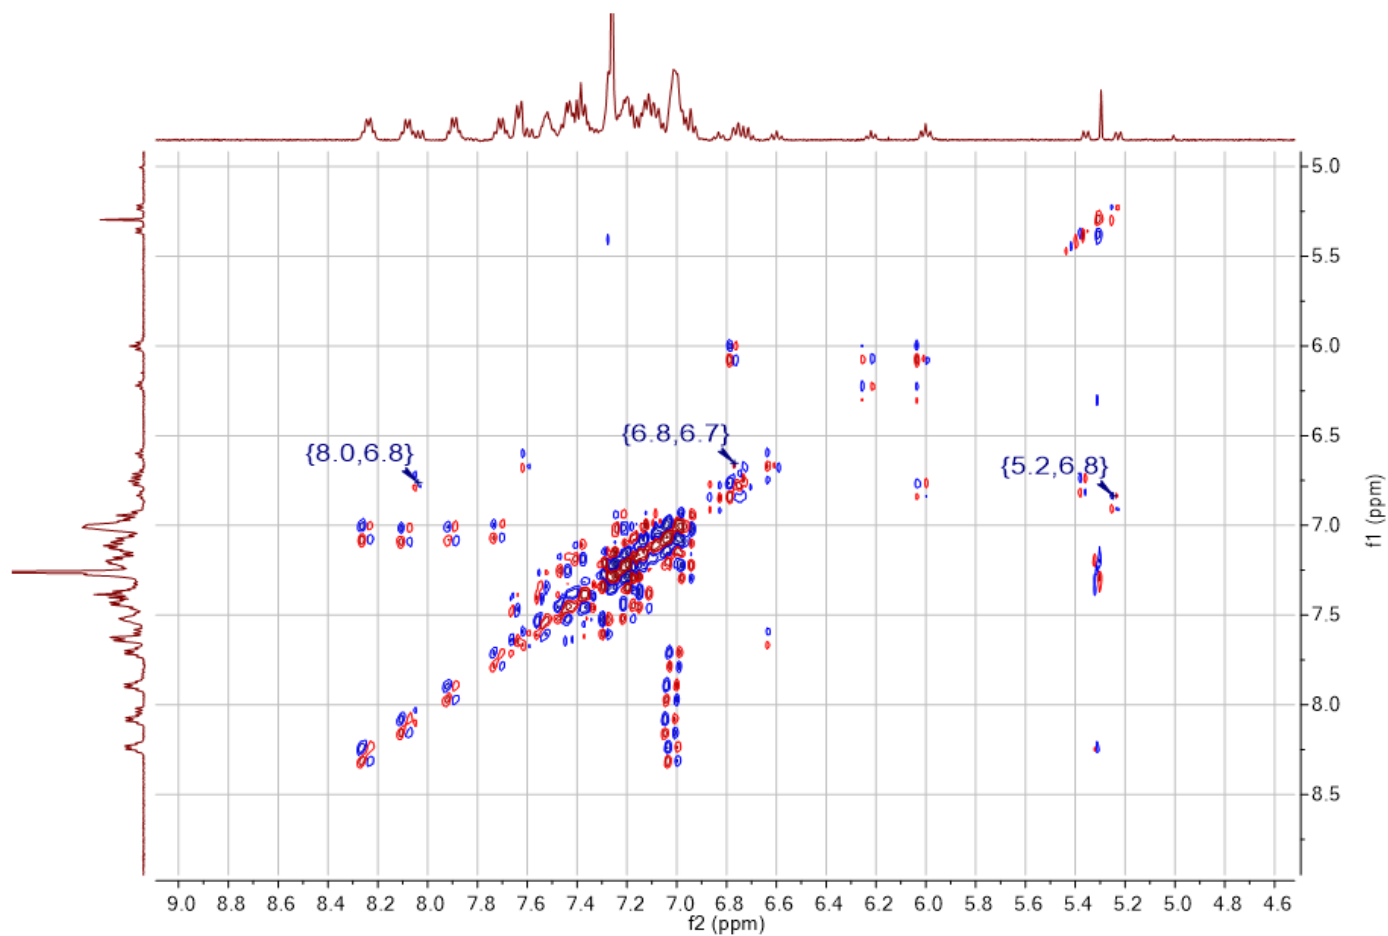

**Figure S20.** <sup>1</sup>H-<sup>1</sup>H COSY NMR (400 MHz, CDCl<sub>3</sub>, 298 K, δ) extract of [Rh<sub>2</sub>(μ-CC<sub>6</sub>H<sub>4</sub>)(μ-Cl)(R)Cl<sub>2</sub>(μ-dppm)<sub>2</sub>] (R = C<sub>6</sub>H<sub>5</sub> 2, Cl 4).

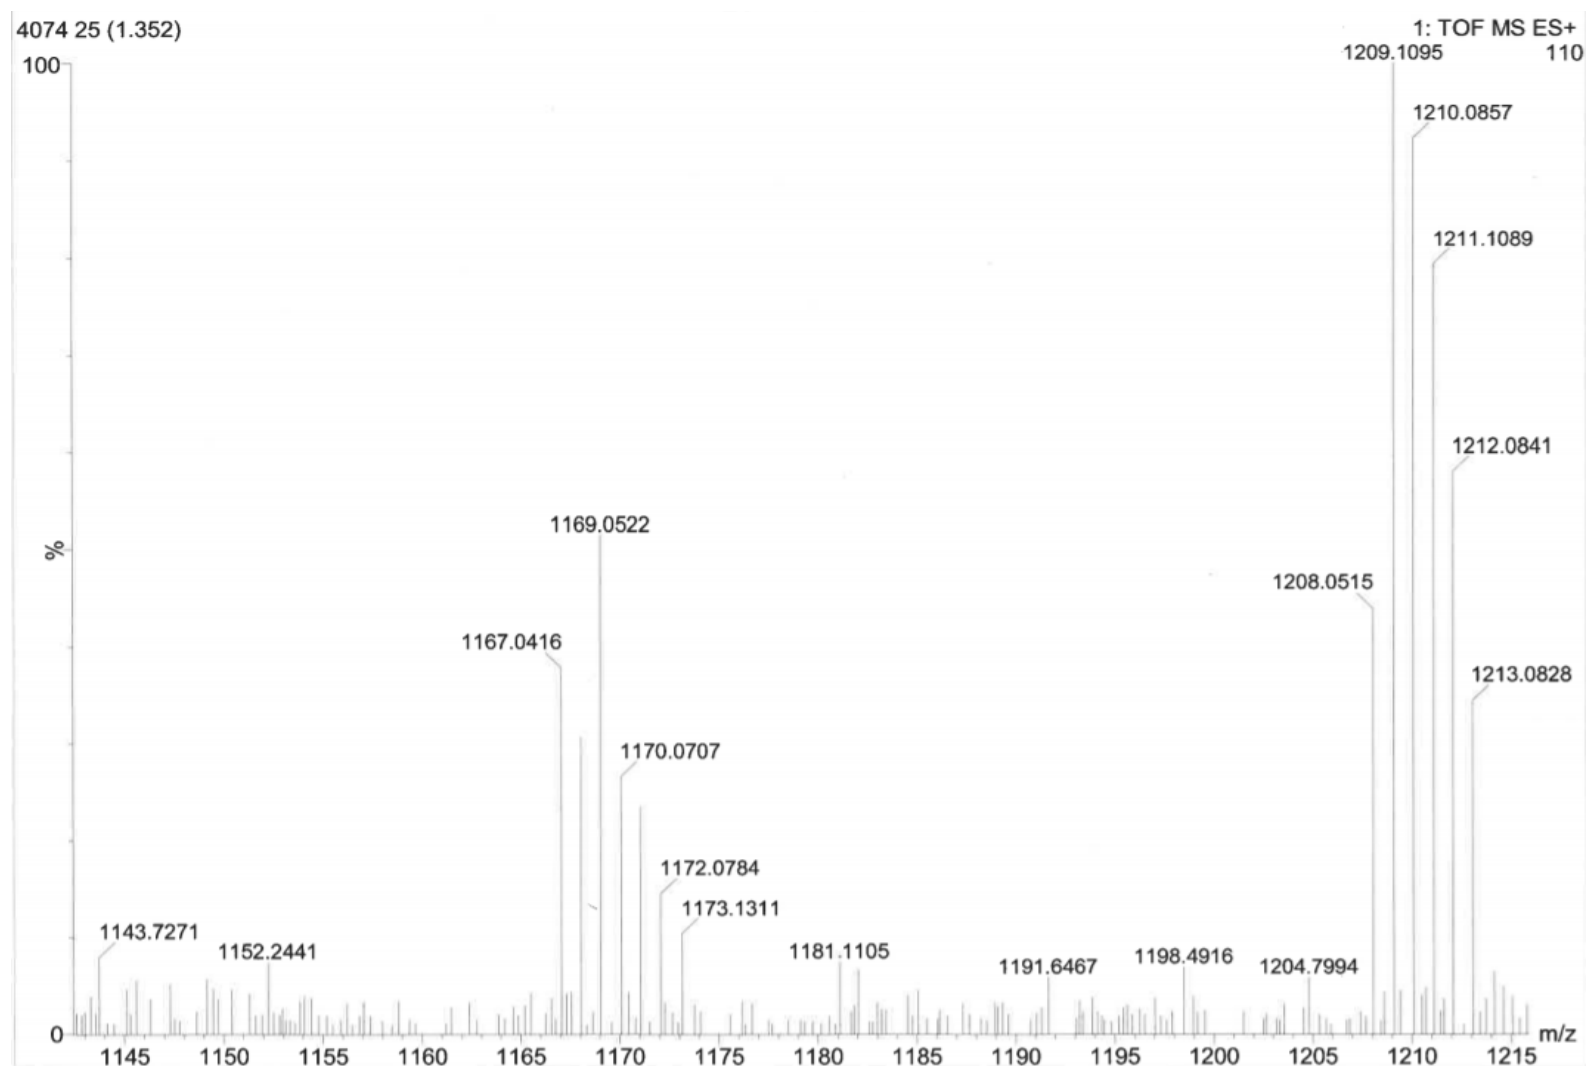

**Figure S21.** ESI-MS [M-Cl]<sup>+</sup> fragmentations of  $[\text{Rh}_2(\mu\text{-CC}_6\text{H}_4)(\mu\text{-Cl})(\text{R})\text{Cl}_2(\mu\text{-dppm})_2]$  (R = C<sub>6</sub>H<sub>5</sub> **2**, Cl **4**).

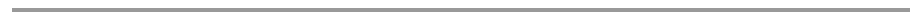

# Dalton Transactions
